# Supplementary material
Source: publisher figshare collection journal article supplement (https://gsapubs.figshare.com/ndownloader/files/22744361)
Supplement: Supplementary file 1 [file 22744361]

**Isotopic, geochemical, and temporal characterization of Proterozoic basement rocks  
in the Quitovac region, northwestern Sonora, Mexico: Implications for the  
reconstruction of the SW margin of Laurentia**

**DATA REPOSITORY MATERIAL**

**Alexander Iriondo**

Department of Geological Sciences, University of Colorado at Boulder, Boulder, Colorado 80309  
U.S. Geological Survey, MS 974, Box 25046, DFC, Denver, Colorado 80225

**Wayne R. Premo**

U.S. Geological Survey, MS 963, Box 25046, DFC, Denver, Colorado 80225

**Luis M. Martínez-Torres**

Departamento de Geodinámica, Universidad del País Vasco, Apartado 644, E-48080 Bilbao, Spain

**James R. Budahn**

U.S. Geological Survey, MS 974, Box 25046, DFC, Denver, Colorado 80225

**William W. Atkinson, Jr.**

Department of Geological Sciences, University of Colorado at Boulder, Boulder, Colorado 80309

**David F. Siems**

U.S. Geological Survey, MS 973, Box 25046, DFC, Denver, Colorado 80225

**Blanca Guarás-González**

Alava Museum of Natural Sciences, Siervas de Jesús, 24, E-01001 Vitoria-Gasteiz, Spain

**ANALYTICAL TECHNIQUES AND DATA TABLES**

Aliquots of the same sample produced zircon separates for U-Pb geochronology, powders for geochemistry of major and trace elements, and powders for whole-rock U-Th-Pb, Rb-Sr, and Sm-Nd isotopic analysis. The Pb-Sr-Nd isotopic data are directly correlative because they are all obtained from the same dissolution, and corresponding initial values are calculated from same sample U-Pb zircon ages, with the exception of the two amphibolite samples in which we assume a 1.7 Ga age for our calculations. The following procedure was completed for each of the samples, and special care was taken to avoid possible sample contamination.

## **Rock Sample Preparation**

Each sample was first crushed and then pulverized using a Bico pulverizer. After pulverizing, the sample was passed through a splitter that mixes the sample in the event layering has occurred. Aliquots of this material were further ground with an agate mortar and pestle providing the appropriate whole rock samples for geochemical and isotopic studies.

The remainder of the sample was placed on a Wilfley table to extract heavy minerals. The heavy fraction with the zircons was then sieved at -60 mesh (250  $\mu\text{m}$ ) and separated into different fractions on a Frantz isodynamic magnetic separator. The Frantz separator was set with a +15° side tilt and a 9° forward tilt. The sample was run through at 0.5, 1.0 and full-scale amp settings. The final non-magnetic fraction was ready for separation using heavy liquids.

The heavy liquid separation was carried out using Methylene Iodide with a density of 3.32 g/cm<sup>3</sup>. This procedure was used primarily to separate zircons from other heavy minerals in the non-magnetic fraction (e.g., apatite). In a final attempt to increase purity, the heavy fraction was put through the Frantz separator again at maximum amps and with a side tilt of +5°. The final zircon fractions were saved in glass vials for further processing and classification procedures in the laboratory.

## **U-Pb Zircon Geochronology - Methods**

Total zircon populations separated for this study were washed, sieved, and magnetically split. Final zircon populations for analysis were handpicked. Prior to dissolution, individual fractions were cleaned in distilled 7N HNO<sub>3</sub>, and weighed into PFA Teflon vials. Dissolution was achieved in distilled concentrated HF + HNO<sub>3</sub> in a large (6.5-cm-diameter) Parr-type TFE Teflon dissolution vessel at 210 °C for approximately 4-7 days using the HF-vapor technique of Krogh (1978). The fractions were then spiked with a <sup>205</sup>Pb-<sup>233</sup>U-<sup>236</sup>U-<sup>230</sup>Th dilute tracer solution and equilibrated at high temperature. Once dissolved, U-Th-Pb from individual fractions were extracted from the zircon solutions using ion exchange resins, Pb in a HBr medium, and U and Th in a HNO<sub>3</sub> medium. The U-Th-Pb isotopic ratios were measured using either a NBS-style, tandem (two-stage) mass spectrometer equipped with an ion-pulse counter at the

end of the second stage, or a VG Isomass 54R fully-automated multi-sample, single-collector, thermal ionization mass spectrometer.

For the zircon analyses, the Pb isotopic ratios were corrected for a mass fractionation of  $0.13 \pm 0.05$  % per a.m.u.; a laboratory Pb blank of varying amounts between 10 and 75 pg total Pb averaging  $37 \pm 7$  pg with a composition of  $^{206}\text{Pb}/^{204}\text{Pb} = 19.05 \pm 0.24$ ,  $^{207}\text{Pb}/^{204}\text{Pb} = 15.496 \pm 0.065$ , and  $^{208}\text{Pb}/^{204}\text{Pb} = 37.87 \pm 0.19$ ; and initial common Pb using values of Stacey and Kramers (1975) at  $^{238}\text{U}/^{204}\text{Pb} = 9.74$  for the appropriate age of the rock. U and Th ratios were corrected for a mass fractionation of  $0.13 \pm 0.03$  % per a.m.u. and both have laboratory blanks between 1 to 20 pg.

### **U-Pb Zircon Geochronology - Results**

Seventeen of the nineteen basement samples from the Quitovac region are granites that yielded zircons. A total of 58 zircon multi-grain fractions were analyzed by conventional thermal ionization mass spectrometry (TIMS) U-Pb zircon geochronology to determine the crystallization ages of these granites. These fractions were hand-picked from sieved, non-magnetic populations, to select the clearest, cleanest, euhedral whole grains with a minimum of inclusions, fractures, and discolorations in an attempt to produce the least discordant and least disturbed isotopic data. In addition, an air-abrasion technique (Krogh, 1982) was employed on several fractions in an attempt to further reduce the degree of discordance. However, in some instances, this technique did not produce favorable results.

Ages were calculated using decay constants from Steiger and Jäger (1977). Concordia intercept ages were determined using data reduction and algorithms of Ludwig (1980, 1989, 1991), that typically produce ages with expanded errors compared with other regression techniques (York, 1969; Davis, 1982). Uncertainties are reported at the 95% confidence level. The U-Pb zircon geochronology results are given in Tables DR1 and DR2 and shown in concordia diagrams in Figures DR1, DR2, and DR3. In addition, a summary with the interpreted crystallization ages for all samples is shown in Table DR3.

TABLE DR1. U, Th, AND Pb CONCENTRATIONS AND Pb ISOTOPIC COMPOSITIONS OF ZIRCON SEPARATES FROM PROTEROZOIC BASEMENT ROCKS IN THE QUITOVAC REGION, NW SONORA, MEXICO

| Sample                       | Fraction | Lab number | Weight (mg) | U (ppm) | Th (ppm) | Pb (ppm) | $^{206}\text{Pb}/^{204}\text{Pb}$ | % error | $^{207}\text{Pb}/^{206}\text{Pb}$ | % error | $^{208}\text{Pb}/^{206}\text{Pb}$ | % error |
|------------------------------|----------|------------|-------------|---------|----------|----------|-----------------------------------|---------|-----------------------------------|---------|-----------------------------------|---------|
| <i>Caborca block samples</i> |          |            |             |         |          |          |                                   |         |                                   |         |                                   |         |
| CA-1                         | A        | 1-2(73)    | 0.135       | 315     | 114      | 88       | 6300                              | 14      | 0.10507                           | 0.262   | 0.11278                           | 0.641   |
|                              | B        | 1-6(57)    | 0.051       | 361     | 129      | 102      | 1611                              | 2.5     | 0.11132                           | 0.417   | 0.12887                           | 0.947   |
|                              | C        | 1-1(73)    | 0.085       | 322     | 115      | 86       | 3110                              | 21      | 0.10571                           | 0.423   | 0.11576                           | 1.01    |
|                              | D        | 1-6(55)    | 0.177       | 380     | 138      | 95       | 6632                              | 0.79    | 0.10464                           | 0.149   | 0.11653                           | 0.348   |
| CA-4                         | A        | 4-1(63)    | 0.059       | 465     | 140      | 124      | 13293                             | 2.56    | 0.09892                           | 0.197   | 0.09423                           | 0.538   |
|                              | B        | 4-2(74)    | 0.166       | 357     | 129      | 100      | 629.5                             | 0.62    | 0.115576                          | 0.362   | 0.153752                          | 0.714   |
|                              | C        | 4-1(58)    | 0.095       | 349     | 122      | 87       | 6548                              | 1.1     | 0.09642                           | 0.089   | 0.1102                            | 0.176   |
|                              | D        | 4-2(58)    | 0.091       | 290     | 115      | 68       | 5262                              | 0.7     | 0.09238                           | 0.108   | 0.12463                           | 0.204   |
| CA-11                        | A        | 11-5(59)   | 0.037       | 378     | 58       | 80       | 3881.7                            | 0.568   | 0.1041                            | 0.339   | 0.06574                           | 1.44    |
|                              | B        | 11-5(66)   | 0.029       | 673     | 100      | 163      | 284.21                            | 0.166   | 0.14803                           | 0.192   | 0.19154                           | 0.393   |
|                              | C        | 11-3(63)   | 0.072       | 659     | 96       | 123      | 5987.1                            | 0.482   | 0.10189                           | 0.243   | 0.06476                           | 1.02    |
|                              | D        | 11-6(66)   | 0.08        | 382     | 49       | 70       | 433.28                            | 0.154   | 0.10085                           | 4.8     | 0.05773                           | 22.7    |
|                              | E        | 11-4(74)   | 0.156       | 180     | 17.5     | 31       | 759.4                             | 0.22    | 0.115                             | 0.237   | 0.08179                           | 0.895   |
| CA-12                        | A        | 12-4(70)   | 0.032       | 584     | 103      | 131      | 3244                              | 1.50    | 0.08991                           | 0.646   | 0.06099                           | 2.530   |
|                              | B        | 12-3(70)   | 0.036       | 569     | 118      | 128      | 2863                              | 2.60    | 0.09376                           | 0.572   | 0.07757                           | 1.830   |
| CA-14                        | A        | 14-3(73)   | 0.083       | 516     | 144      | 146      | 6530                              | 13      | 0.1036                            | 0.254   | 0.09044                           | 0.772   |
|                              | B        | 14-4(73)   | 0.158       | 571     | 139      | 155      | 13600                             | 16      | 0.10269                           | 0.13    | 0.07957                           | 0.437   |
|                              | C        | 14-2(71)   | 0.05        | 548     | 137      | 149      | 2737                              | 0.44    | 0.10591                           | 0.273   | 0.0854                            | 0.9     |
|                              | D        | 14-1(71)   | 0.099       | 165     | 71       | 43       | 115.69                            | 0.28    | 0.10489                           | 20.1    | 0.08601                           | 65.8    |
| CA-15                        | A        | 15-3(71)   | 0.082       | 502     | 743      | 143      | 2838                              | 0.88    | 0.10644                           | 0.176   | 0.09049                           | 0.545   |
|                              | B        | 15-4(71)   | 0.105       | 535     | 135      | 148      | 7914                              | 1       | 0.10345                           | 0.14    | 0.08228                           | 0.454   |
| CA-16                        | A        | 16-3(72)   | 0.056       | 289     | 99       | 82       | 2347                              | 0.69    | 0.10677                           | 0.537   | 0.11369                           | 1.33    |
|                              | B        | 16-4(69)   | 0.055       | 239     | 79       | 65       | 3328                              | 1.4     | 0.10601                           | 0.327   | 0.10977                           | 0.834   |
|                              | C        | 16-4(72)   | 0.088       | 363     | 120      | 114      | 336.1                             | 0.67    | 0.14327                           | 0.198   | 0.2209                            | 0.337   |
|                              | D        | 16-3(69)   | 0.097       | 316     | 102      | 84       | 4150                              | 13      | 0.10566                           | 0.293   | 0.10972                           | 0.74    |
| CA-17                        | A        | 17-1(72)   | 0.072       | 634     | 110      | 144      | 5250                              | 2.5     | 0.10362                           | 0.236   | 0.06537                           | 1       |
|                              | B        | 17-1(69)   | 0.057       | 589     | 93       | 130      | 2222                              | 3.9     | 0.10713                           | 0.109   | 0.07345                           | 0.412   |
|                              | C        | 17-2(69)   | 0.086       | 620     | 98       | 135      | 3880                              | 5.2     | 0.10459                           | 0.077   | 0.06583                           | 0.293   |
|                              | D        | 17-2(72)   | 0.141       | 657     | 29       | 140      | 3080                              | 11      | 0.10476                           | 0.13    | 0.0627                            | 0.558   |
| CA-18                        | A        | 18-5(69)   | 0.056       | 445     | 122      | 113      | 2400                              | 6.5     | 0.10421                           | 0.742   | 0.09217                           | 2.24    |
|                              | B        | 18-6(69)   | 0.084       | 380     | 105      | 97       | 4180                              | 4.1     | 0.10495                           | 0.289   | 0.09716                           | 0.829   |
|                              | C        | 18-5(72)   | 0.061       | 520     | 138      | 129      | 2718                              | 3.1     | 0.1061                            | 0.311   | 0.09849                           | 0.892   |
|                              | D        | 18-6(72)   | 0.075       | 666     | 186      | 157      | 3559                              | 2.3     | 0.10528                           | 0.212   | 0.10275                           | 0.575   |
| CA-19                        | A        | 19-5(73)   | 0.038       | 315     | 1172     | 88       | 1810                              | 7.3     | 0.10503                           | 0.918   | 0.10732                           | 2.38    |
|                              | B        | 19-5(70)   | 0.055       | 365     | 122      | 99       | 2268                              | 0.94    | 0.10639                           | 0.44    | 0.11301                           | 1.08    |
|                              | C        | 19-6(73)   | 340         | 104     | 92       | 3760     | 16                                | 0.1044  | 0.378                             | 0.10725 | 0.964                             |         |
|                              | D        | 19-6(70)   | 0.08        | 341     | 113      | 91       | 3860                              | 2.8     | 0.10499                           | 0.334   | 0.10895                           | 0.841   |
| CA-20                        | A        | 20-6(71)   | 0.083       | 309     | 101      | 90       | 4979                              | 1.5     | 0.10503                           | 0.279   | 0.10262                           | 0.754   |
|                              | B        | 20-5(71)   | 0.076       | 440     | 137      | 126      | 6160                              | 16      | 0.10487                           | 0.224   | 0.09775                           | 0.621   |
|                              | C        | 20-6(74)   | 0.159       | 309     | 108      | 93       | 688.7                             | 0.83    | 0.12315                           | 0.085   | 0.15561                           | 0.172   |

TABLE DR1. (continued).

| Sample                                     | Fraction | Lab number | Weight<br>(mg) | U<br>(ppm) | Th<br>(ppm) | Pb<br>(ppm) | $^{206}\text{Pb}/^{204}\text{Pb}^{\dagger}$ | % error | $^{207}\text{Pb}/^{206}\text{Pb}^{\ddagger}$ | % error | $^{208}\text{Pb}/^{206}\text{Pb}^{\ddagger}$ | % error |
|--------------------------------------------|----------|------------|----------------|------------|-------------|-------------|---------------------------------------------|---------|----------------------------------------------|---------|----------------------------------------------|---------|
| <i>“Grenvillian” Caborca block samples</i> |          |            |                |            |             |             |                                             |         |                                              |         |                                              |         |
| CAG-2                                      | A        | 2-2(57)    | 0.222          | 249        | 98          | 49          | 575                                         | 0.41    | 0.09927                                      | 0.235   | 0.18256                                      | 0.324   |
|                                            | B        | 2-3(57)    | 0.242          | 287        | 101         | 51          | 2416                                        | 2.4     | 0.0802                                       | 0.247   | 0.12587                                      | 0.399   |
|                                            | C        | 2-1(57)    | 0.324          | 519        | 212         | 86          | 1031.1                                      | 0.3     | 0.08803                                      | 0.114   | 0.16407                                      | 0.159   |
| CAG-13                                     | A        | 13-1(70)   | 0.071          | 806        | 274         | 147         | 5850                                        | 7.6     | 0.07679                                      | 0.322   | 0.10744                                      | 0.585   |
|                                            | B        | 13-2(70)   | 0.125          | 901        | 284         | 163         | 2250                                        | 5.7     | 0.08123                                      | 0.226   | 0.11405                                      | 0.289   |
| <i>“North America” block samples</i>       |          |            |                |            |             |             |                                             |         |                                              |         |                                              |         |
| NA-3                                       | A        | 3-1(74)    | 0.213          | 145        | 113         | 45          | 773.1                                       | 0.53    | 0.11743                                      | 0.604   | 0.141762                                     | 1.33    |
|                                            | B        | 3-4(57)    | 0.073          | 223        | 76          | 66          | 3830                                        | 9.9     | 0.10583                                      | 0.468   | 0.11012                                      | 1.18    |
|                                            | C        | 3-1(66)    | 0.037          | 246        | 90          | 80          | 188.25                                      | 0.22    | 0.1317                                       | 5.44    | 0.19482                                      | 9.66    |
|                                            | D        | 3-5(57)    | 0.172          | 225        | 90          | 67          | 1245                                        | 3.6     | 0.11438                                      | 0.189   | 0.15131                                      | 0.371   |
| NA-5                                       | A        | 5-3(58)    | 0.028          | 1162       | 289         | 210         | 2640                                        | 0.63    | 0.10322                                      | 0.101   | 0.08946                                      | 0.29    |
|                                            | B        | 5-4(58)    | 0.026          | 1796       | 390         | 278         | 1873.5                                      | 0.17    | 0.10408                                      | 0.086   | 0.08509                                      | 0.248   |
|                                            | C        | 5-2(66)    | 0.038          | 2426       | 455         | 358         | 755                                         | 2.3     | 0.09741                                      | 2.8     | 0.06002                                      | 12.2    |
| NA-7                                       | A        | 7-3(66)    | 0.07           | 374        | 111         | 119         | 507.3                                       | 0.39    | 0.1297                                       | 0.146   | 0.157                                        | 0.293   |
|                                            | B        | 7-3(74)    | 0.173          | 301        | 107         | 93          | 690.9                                       | 0.42    | 0.12298                                      | 0.09    | 0.15745                                      | 0.16    |
|                                            | C        | 7-6(62)    | 0.039          | 386        | 120         | 107         | 4238.9                                      | 0.236   | 0.10473                                      | 0.515   | 0.10036                                      | 1.42    |
| NA-8                                       | A        | 8-2(59)    | 0.058          | 360        | 120         | 101         | 5119.9                                      | 0.773   | 0.10548                                      | 0.198   | 0.10884                                      | 0.466   |
|                                            | B        | 8-2(63)    | 0.042          | 365        | 111         | 96          | 5538.2                                      | 0.756   | 0.10438                                      | 0.179   | 0.10129                                      | 0.482   |
|                                            | C        | 8-4(66)    | 0.03           | 388        | 117         | 129         | 219.67                                      | 0.15    | 0.15889                                      | 0.596   | 0.25001                                      | 1.01    |

<sup>(†)</sup> Measured isotopic ratio, uncorrected for laboratory blank Pb and mass fractionation.

<sup>(‡)</sup> Isotopic ratio corrected for laboratory blank Pb (total Pb blanks between 10 and 75 pg total averaging  $37 \pm 7$  pg with isotopic composition of  $^{206}\text{Pb}/^{204}\text{Pb} = 19.05 \pm 0.24$ ,  $^{207}\text{Pb}/^{206}\text{Pb} = 15.496 \pm 0.065$ , and  $^{208}\text{Pb}/^{206}\text{Pb} = 37.87 \pm 0.19$ ) and mass fractionation ( $0.13 \pm 0.03$  ‰ per a.m.u.) using the PBDAT Pb isotope reduction program of Ludwig (1989).

TABLE DR2. U-Pb RADIOGENIC ISOTOPIC DATA FOR ZIRCON SEPARATES OF PROTEROZOIC BASEMENT ROCKS  
IN THE QUITOVAC REGION, NW SONORA, MEXICO

| Sample                       | Fraction | Lab number | $^{207}\text{Pb}/^{235}\text{U}^a$ | % error | $^{206}\text{Pb}/^{238}\text{U}^a$ | % error | U-Pb correlation<br>error | $^{207}\text{Pb}/^{206}\text{Pb}^a$ | % error | $^{207}\text{Pb}/^{235}\text{U}^b$<br>age (Ma) | $^{206}\text{Pb}/^{238}\text{U}^b$<br>age (Ma) | $^{207}\text{Pb}/^{206}\text{Pb}^b$<br>age (Ma) |
|------------------------------|----------|------------|------------------------------------|---------|------------------------------------|---------|---------------------------|-------------------------------------|---------|------------------------------------------------|------------------------------------------------|-------------------------------------------------|
| <i>Caborca block samples</i> |          |            |                                    |         |                                    |         |                           |                                     |         |                                                |                                                |                                                 |
| CA-1                         | A        | 1-2(73)    | 3.8478                             | 0.400   | 0.26643                            | 0.235   | 0.693                     | 0.10474                             | 0.291   | 1603                                           | 1523                                           | 1710 ± 5.4                                      |
|                              | B        | 1-6(57)    | 3.7841                             | 0.261   | 0.26194                            | 0.120   | 0.618                     | 0.10478                             | 0.210   | 1589                                           | 1500                                           | 1710 ± 3.9                                      |
|                              | C        | 1-1(73)    | 3.6689                             | 1.130   | 0.25514                            | 0.548   | 0.636                     | 0.10430                             | 0.887   | 1565                                           | 1465                                           | 1702 ± 16                                       |
|                              | D        | 1-6(55)    | 3.3792                             | 0.134   | 0.23746                            | 0.126   | 0.942                     | 0.10321                             | 0.045   | 1500                                           | 1374                                           | 1683 ± 0.83                                     |
| CA-4                         | A        | 4-1(63)    | 3.5256                             | 0.280   | 0.25913                            | 0.275   | 0.984                     | 0.09868                             | 0.050   | 1533                                           | 1485                                           | 1599 ± 0.94                                     |
|                              | B        | 4-2(74)    | 3.3308                             | 0.237   | 0.25028                            | 0.169   | 0.773                     | 0.09652                             | 0.151   | 1488                                           | 1440                                           | 1558 ± 2.8                                      |
|                              | C        | 4-1(58)    | 3.1236                             | 0.253   | 0.23947                            | 0.246   | 0.972                     | 0.09461                             | 0.059   | 1439                                           | 1384                                           | 1520 ± 1.1                                      |
|                              | D        | 4-2(58)    | 2.7587                             | 0.508   | 0.22193                            | 0.506   | 0.996                     | 0.09015                             | 0.045   | 1344                                           | 1292                                           | 1429 ± 0.87                                     |
| CA-11                        | A        | 11-5(59)   | 2.9395                             | 0.277   | 0.20892                            | 0.272   | 0.982                     | 0.10205                             | 0.052   | 1392                                           | 1223                                           | 1662 ± 0.96                                     |
|                              | B        | 11-5(66)   | 2.7771                             | 0.396   | 0.19795                            | 0.374   | 0.950                     | 0.10175                             | 0.123   | 1349                                           | 1164                                           | 1656 ± 2.3                                      |
|                              | C        | 11-3(63)   | 2.5811                             | 0.224   | 0.18607                            | 0.221   | 0.985                     | 0.10061                             | 0.039   | 1295                                           | 1100                                           | 1635 ± 0.72                                     |
|                              | D        | 11-6(66)   | 2.5604                             | 0.727   | 0.18504                            | 0.717   | 0.977                     | 0.10035                             | 0.154   | 1289                                           | 1095                                           | 1631 ± 2.9                                      |
|                              | E        | 11-4(74)   | 2.2513                             | 0.127   | 0.16539                            | 0.102   | 0.820                     | 0.09873                             | 0.073   | 1197                                           | 987                                            | 1600 ± 1.4                                      |
| CA-12                        | A        | 12-4(70)   | 2.8002                             | 0.197   | 0.22681                            | 0.170   | 0.881                     | 0.08954                             | 0.093   | 1356                                           | 1318                                           | 1416 ± 1.8                                      |
|                              | B        | 12-3(70)   | 2.8387                             | 0.216   | 0.22240                            | 0.149   | 0.750                     | 0.09257                             | 0.144   | 1366                                           | 1295                                           | 1479 ± 2.7                                      |
| CA-14                        | A        | 14-3(73)   | 3.9336                             | 0.315   | 0.27624                            | 0.113   | 0.586                     | 0.10328                             | 0.265   | 1621                                           | 1572                                           | 1684 ± 4.9                                      |
|                              | B        | 14-4(73)   | 3.7732                             | 0.199   | 0.26684                            | 0.092   | 0.616                     | 0.10256                             | 0.160   | 1587                                           | 1525                                           | 1671 ± 3                                        |
|                              | C        | 14-2(71)   | 3.7596                             | 0.200   | 0.26510                            | 0.193   | 0.968                     | 0.10286                             | 0.050   | 1584                                           | 1516                                           | 1676 ± 0.93                                     |
|                              | D        | 14-1(71)   | 3.6372                             | 3.120   | 0.25468                            | 3.100   | 0.974                     | 0.10358                             | 0.712   | 1558                                           | 1463                                           | 1689 ± 13                                       |
| CA-15                        | A        | 15-3(71)   | 3.9132                             | 0.091   | 0.27592                            | 0.067   | 0.768                     | 0.10286                             | 0.058   | 1616                                           | 1571                                           | 1676 ± 1.1                                      |
|                              | B        | 15-4(71)   | 3.8368                             | 0.101   | 0.27108                            | 0.088   | 0.877                     | 0.10265                             | 0.049   | 1601                                           | 1546                                           | 1673 ± 0.9                                      |
| CA-16                        | A        | 16-3(72)   | 3.9006                             | 0.202   | 0.26994                            | 0.186   | 0.926                     | 0.10480                             | 0.076   | 1614                                           | 1541                                           | 1711 ± 1.4                                      |
|                              | B        | 16-4(69)   | 3.7521                             | 0.159   | 0.26100                            | 0.141   | 0.900                     | 0.10426                             | 0.069   | 1583                                           | 1495                                           | 1701 ± 1.3                                      |
|                              | C        | 16-4(72)   | 3.6621                             | 0.358   | 0.25400                            | 0.179   | 0.641                     | 0.10457                             | 0.280   | 1563                                           | 1459                                           | 1707 ± 5.2                                      |
|                              | D        | 16-3(69)   | 3.6383                             | 0.472   | 0.25266                            | 0.119   | 0.606                     | 0.10444                             | 0.411   | 1558                                           | 1452                                           | 1705 ± 7.6                                      |
| CA-17                        | A        | 17-1(72)   | 3.2024                             | 0.248   | 0.22625                            | 0.236   | 0.957                     | 0.10266                             | 0.072   | 1458                                           | 1315                                           | 1673 ± 1.3                                      |
|                              | B        | 17-1(69)   | 3.0201                             | 0.280   | 0.21531                            | 0.085   | 0.581                     | 0.10173                             | 0.240   | 1413                                           | 1257                                           | 1656 ± 4.4                                      |
|                              | C        | 17-2(69)   | 3.0194                             | 0.280   | 0.21567                            | 0.192   | 0.755                     | 0.10154                             | 0.185   | 1413                                           | 1259                                           | 1652 ± 3.4                                      |
|                              | D        | 17-2(72)   | 2.9445                             | 0.563   | 0.21105                            | 0.160   | 0.587                     | 0.10118                             | 0.487   | 1393                                           | 1234                                           | 1646 ± 9                                        |
| CA-18                        | A        | 18-5(69)   | 3.5225                             | 0.427   | 0.24635                            | 0.147   | 0.585                     | 0.10371                             | 0.361   | 1532                                           | 1420                                           | 1692 ± 6.7                                      |
|                              | B        | 18-6(69)   | 3.5227                             | 0.173   | 0.24631                            | 0.088   | 0.639                     | 0.10373                             | 0.135   | 1532                                           | 1419                                           | 1692 ± 2.5                                      |
|                              | C        | 18-5(72)   | 3.4002                             | 0.210   | 0.23873                            | 0.120   | 0.678                     | 0.10330                             | 0.156   | 1504                                           | 1380                                           | 1684 ± 2.9                                      |
|                              | D        | 18-6(72)   | 3.2020                             | 0.221   | 0.22560                            | 0.196   | 0.909                     | 0.10294                             | 0.092   | 1458                                           | 1311                                           | 1678 ± 1.7                                      |
| CA-19                        | A        | 19-5(73)   | 3.8198                             | 0.708   | 0.26645                            | 0.389   | 0.669                     | 0.10397                             | 0.533   | 1597                                           | 1523                                           | 1696 ± 9.8                                      |
|                              | B        | 19-5(70)   | 3.6841                             | 0.162   | 0.25817                            | 0.127   | 0.801                     | 0.10350                             | 0.097   | 1568                                           | 1481                                           | 1688 ± 1.8                                      |
|                              | C        | 19-6(73)   | 3.6842                             | 0.655   | 0.25843                            | 0.189   | 0.589                     | 0.10340                             | 0.564   | 1568                                           | 1482                                           | 1686 ± 10                                       |
|                              | D        | 19-6(70)   | 3.6661                             | 0.215   | 0.25619                            | 0.173   | 0.834                     | 0.10379                             | 0.119   | 1564                                           | 1470                                           | 1693 ± 2.2                                      |
| CA-20                        | A        | 20-6(71)   | 4.0361                             | 0.128   | 0.28076                            | 0.110   | 0.872                     | 0.10426                             | 0.063   | 1642                                           | 1595                                           | 1701 ± 1.2                                      |
|                              | B        | 20-5(71)   | 3.9636                             | 0.498   | 0.27589                            | 0.320   | 0.729                     | 0.10420                             | 0.343   | 1627                                           | 1571                                           | 1700 ± 6.3                                      |
|                              | C        | 20-6(74)   | 3.8152                             | 0.242   | 0.26615                            | 0.154   | 0.720                     | 0.10397                             | 0.169   | 1596                                           | 1521                                           | 1696 ± 3.1                                      |

TABLE DR2. (continued).

| Sample                                     | Fraction | Lab number | $^{207}\text{Pb}/^{235}\text{U}^a$ | % error | $^{206}\text{Pb}/^{238}\text{U}^a$ | % error | U-Pb correlation error | $^{207}\text{Pb}/^{206}\text{Pb}^a$ | % error | $^{207}\text{Pb}/^{235}\text{U}^b$<br>age (Ma) | $^{206}\text{Pb}/^{238}\text{U}^b$<br>age (Ma) | $^{207}\text{Pb}/^{206}\text{Pb}^b$<br>age (Ma) |
|--------------------------------------------|----------|------------|------------------------------------|---------|------------------------------------|---------|------------------------|-------------------------------------|---------|------------------------------------------------|------------------------------------------------|-------------------------------------------------|
| <i>"Grenvillian" Caborca block samples</i> |          |            |                                    |         |                                    |         |                        |                                     |         |                                                |                                                |                                                 |
| CAG-2                                      | A        | 2-2(57)    | 1.8179                             | 0.177   | 0.17446                            | 0.076   | 0.558                  | 0.07557                             | 0.149   | 1052                                           | 1037                                           | 1084 ± 3                                        |
|                                            | B        | 2-3(57)    | 1.7707                             | 0.213   | 0.17083                            | 0.053   | 0.511                  | 0.07517                             | 0.192   | 1035                                           | 1017                                           | 1073 ± 3.9                                      |
|                                            | C        | 2-1(57)    | 1.5588                             | 0.112   | 0.15130                            | 0.085   | 0.783                  | 0.07472                             | 0.070   | 954                                            | 908                                            | 1061 ± 1.4                                      |
| CAG-13                                     | A        | 13-1(70)   | 1.8695                             | 0.344   | 0.17836                            | 0.217   | 0.702                  | 0.07602                             | 0.247   | 1070                                           | 1058                                           | 1096 ± 4.9                                      |
|                                            | B        | 13-2(70)   | 1.8277                             | 0.722   | 0.17492                            | 0.470   | 0.712                  | 0.07578                             | 0.509   | 1055                                           | 1039                                           | 1089 ± 10                                       |
| <i>"North America" block samples</i>       |          |            |                                    |         |                                    |         |                        |                                     |         |                                                |                                                |                                                 |
| NA-3                                       | A        | 3-1(74)    | 4.0899                             | 0.167   | 0.28376                            | 0.125   | 0.794                  | 0.10453                             | 0.101   | 1652                                           | 1610                                           | 1706 ± 1.9                                      |
|                                            | B        | 3-4(57)    | 4.0474                             | 0.401   | 0.28136                            | 0.140   | 0.588                  | 0.10433                             | 0.338   | 1644                                           | 1598                                           | 1703 ± 6.2                                      |
|                                            | C        | 3-1(66)    | 3.9531                             | 1.110   | 0.27510                            | 1.090   | 0.967                  | 0.10422                             | 0.284   | 1625                                           | 1567                                           | 1701 ± 5.2                                      |
|                                            | D        | 3-5(57)    | 3.8836                             | 0.454   | 0.27005                            | 0.150   | 0.590                  | 0.10430                             | 0.385   | 1610                                           | 1541                                           | 1702 ± 7.1                                      |
| NA-5                                       | A        | 5-3(58)    | 2.3738                             | 0.204   | 0.17488                            | 0.196   | 0.962                  | 0.09844                             | 0.056   | 1235                                           | 1039                                           | 1595 ± 1                                        |
|                                            | B        | 5-4(58)    | 2.0086                             | 0.181   | 0.15006                            | 0.174   | 0.961                  | 0.09708                             | 0.050   | 1118                                           | 901                                            | 1569 ± 0.93                                     |
|                                            | C        | 5-2(66)    | 1.9824                             | 0.677   | 0.14817                            | 0.460   | 0.745                  | 0.09704                             | 0.454   | 1110                                           | 891                                            | 1568 ± 8.5                                      |
| NA-7                                       | A        | 7-3(66)    | 3.9743                             | 0.223   | 0.27735                            | 0.166   | 0.780                  | 0.10393                             | 0.140   | 1629                                           | 1578                                           | 1696 ± 2.6                                      |
|                                            | B        | 7-3(74)    | 3.9122                             | 0.172   | 0.27332                            | 0.128   | 0.780                  | 0.10381                             | 0.108   | 1616                                           | 1558                                           | 1693 ± 2                                        |
|                                            | C        | 7-6(62)    | 3.8268                             | 0.199   | 0.26761                            | 0.184   | 0.929                  | 0.10371                             | 0.074   | 1598                                           | 1529                                           | 1692 ± 1.4                                      |
| NA-8                                       | A        | 8-2(59)    | 3.8313                             | 0.213   | 0.26825                            | 0.187   | 0.881                  | 0.10359                             | 0.101   | 1599                                           | 1532                                           | 1689 ± 1.9                                      |
|                                            | B        | 8-2(63)    | 3.6157                             | 0.293   | 0.25416                            | 0.289   | 0.985                  | 0.10318                             | 0.050   | 1553                                           | 1460                                           | 1682 ± 0.93                                     |
|                                            | C        | 8-4(66)    | 3.5773                             | 0.342   | 0.25178                            | 0.312   | 0.923                  | 0.10305                             | 0.132   | 1545                                           | 1448                                           | 1680 ± 2.4                                      |

<sup>(a)</sup> Radiogenic ratios, corrected for laboratory Pb blank, mass fractionation (see Table DR1 footnotes), and initial Pb, equal to Stacey and Kramers (1975) values for the appropriate age (U-Pb zircon) of the sample using the PBDAT Pb isotope reduction program of Ludwig (1989).

<sup>(b)</sup> U-Pb and Pb-Pb ages calculated using PBDAT program (Ludwig, 1989) and U decay constants from Steiger and Jäger (1977); errors are given at the 2σ level.

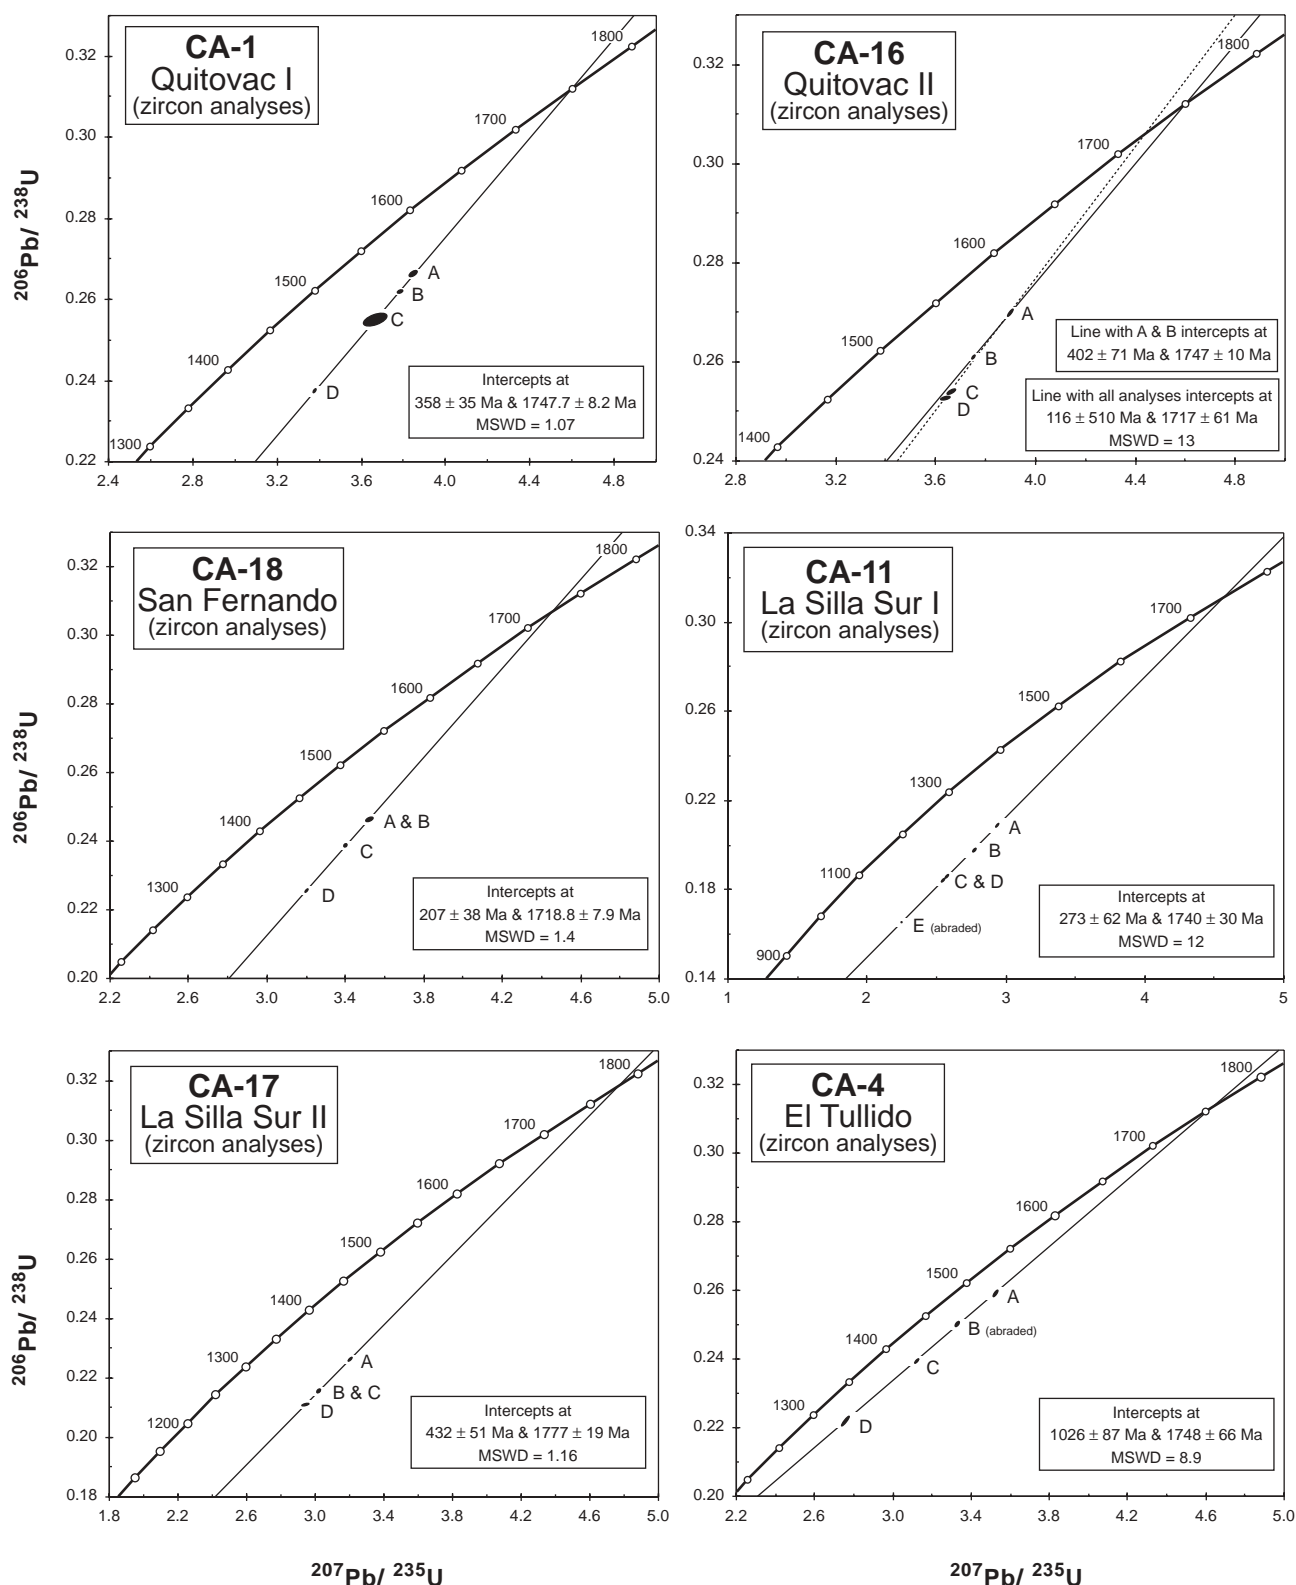

**Figure DR1.** Concordia diagrams with U-Pb analyses for zircons from the Paleoproterozoic Caborca block basement granitoids in the Quitovac region, NW Sonora, Mexico. Individual analyses are depicted in these diagrams as 2 sigma error ellipses as determined using PBDAT (Ludwig, 1989). Shaded area in CA-12 is the area of possible ages assuming the youngest possible Pb-loss from analysis A at 0 Ma, and the oldest reasonable lower-intercept age of  $\sim 1126$  Ma for analysis B. All age regressions determined using Isoplot/Ex (Ludwig, 1998). MSWD = Mean Square of Weighted Deviates.



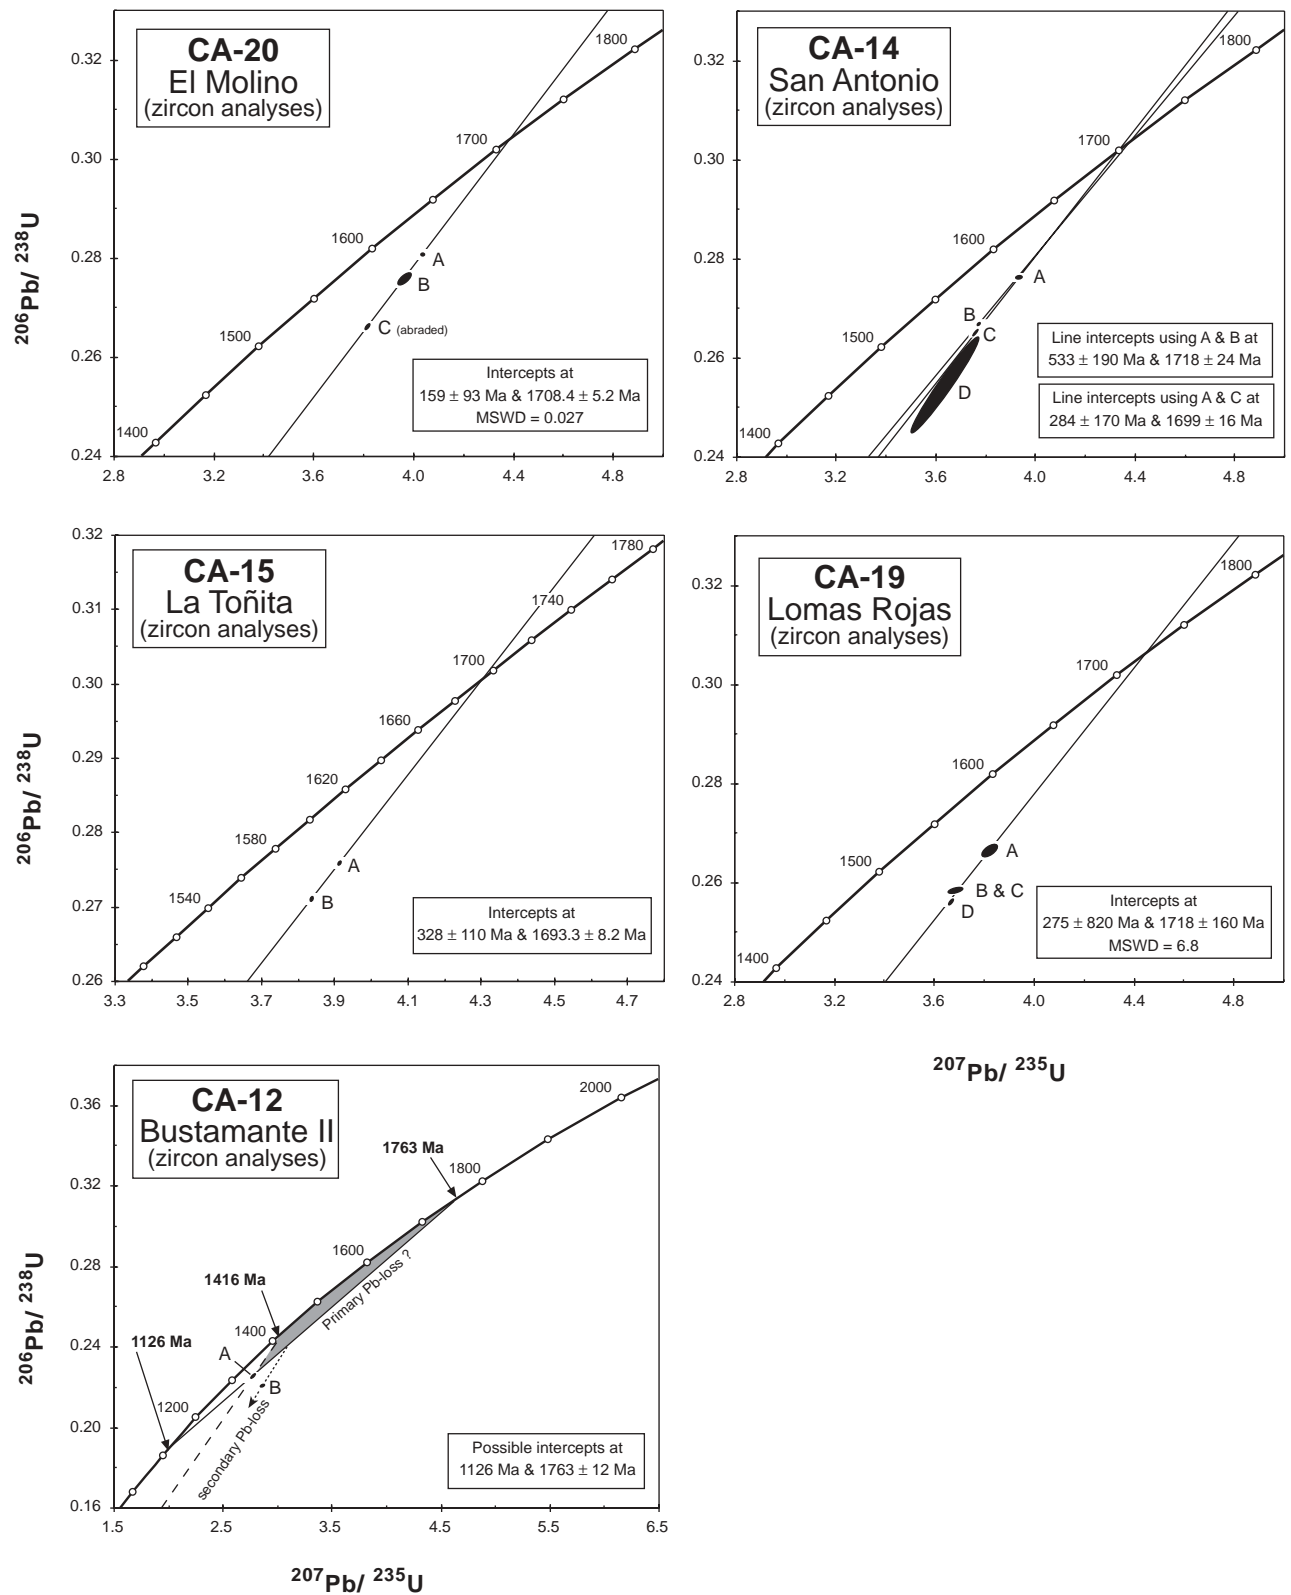

Figure DR1. Cont.

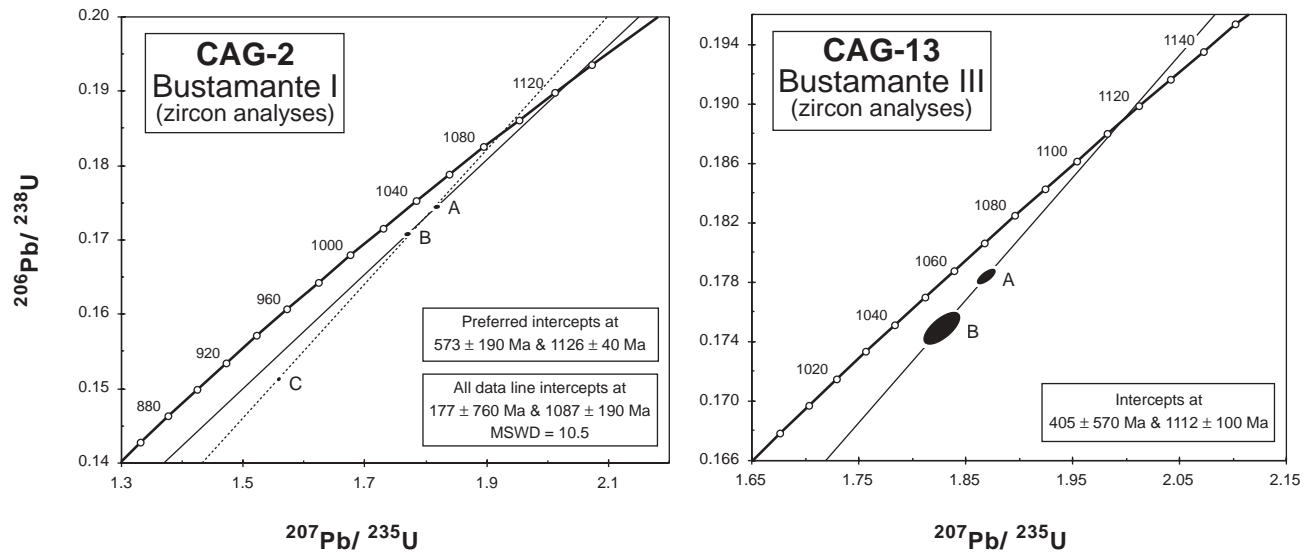

**Figure DR2.** Concordia diagrams with U-Pb analyses for zircons from the “Grenvillian” Caborca basement granitoids in the Quitovac region, NW Sonora, Mexico. Although these ages have very large errors, based on only 2 or 3 analyses, the results indicate a Grenvillian age of ~ 1120 Ma for these two samples. Individual analyses are depicted in these diagrams as 2 sigma error ellipses (Ludwig, 1989). Ages from regression treatment of Ludwig (1998). MSWD = Mean Square of Weighted Deviates.

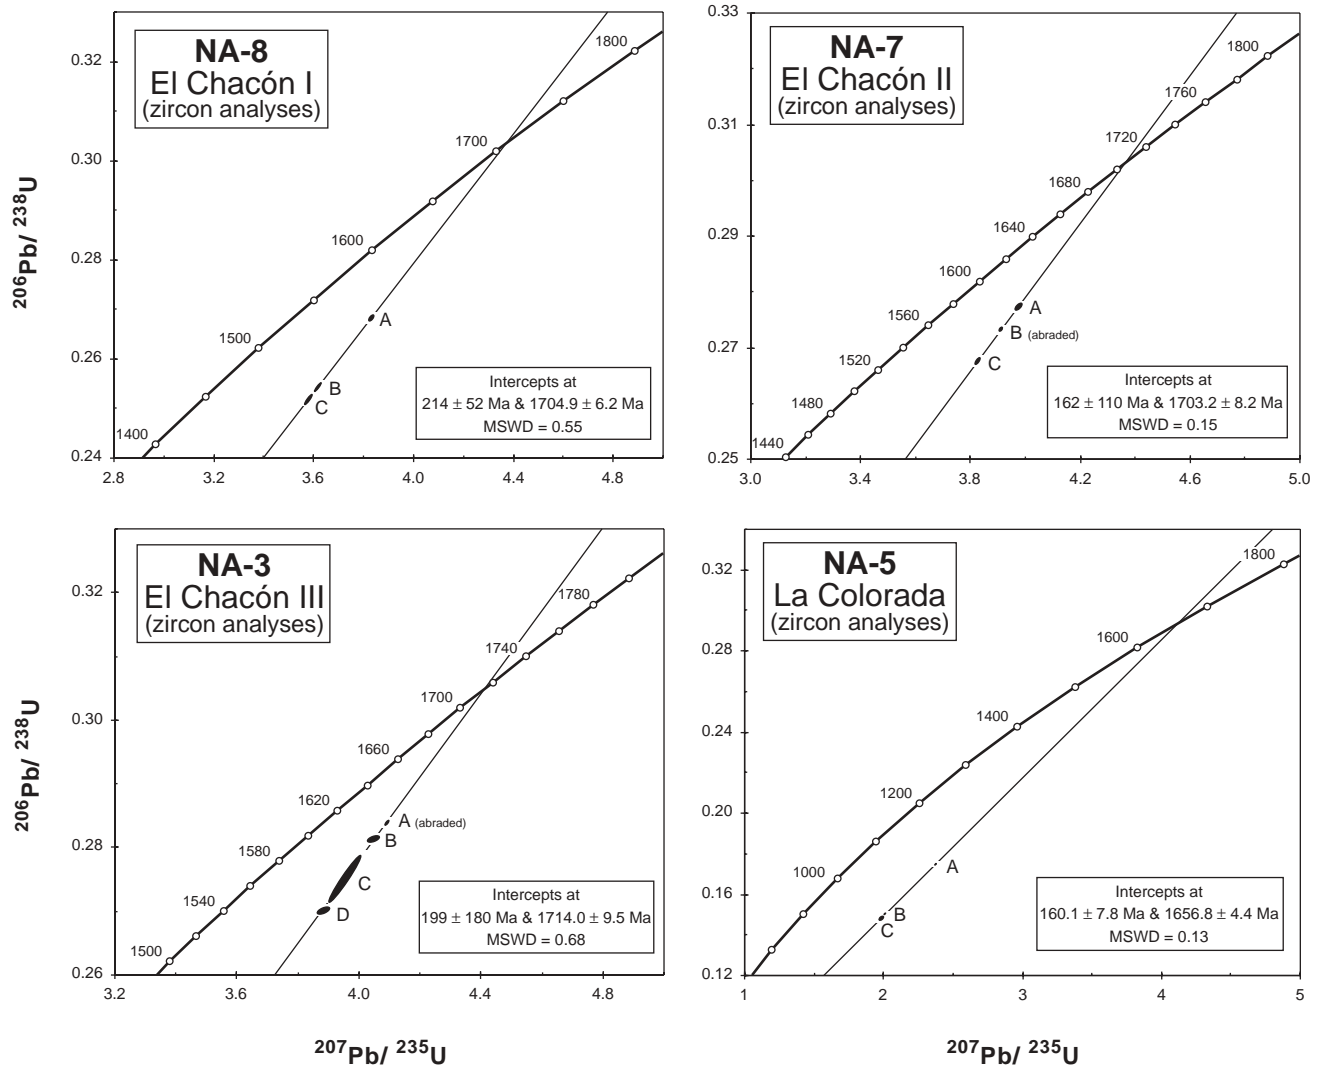

**Figure DR3.** Concordia diagrams with U-Pb analyses for zircons from the Paleoproterozoic “North America” block basement granitoids in the Quitovac region, NW Sonora, Mexico. Individual analyses are depicted in these diagrams as 2 sigma error ellipses (Ludwig, 1989). Ages from regression treatment of Ludwig (1998). MSWD = Mean Square of Weighted Deviates.

TABLE DR3. SUMMARY OF U-Pb ZIRCON GEOCHRONOLOGY FOR PROTEROZOIC BASEMENT ROCKS IN THE QUITOVAC REGION, NW SONORA, MEXICO

| Sample                                     | Location        | Number of fractions <sup>(c)</sup> | MSWD <sup>(d)</sup> | Concordia Lower-intercept Age (Ma) | Concordia Upper-intercept Age (Ma) <sup>(e)</sup> |
|--------------------------------------------|-----------------|------------------------------------|---------------------|------------------------------------|---------------------------------------------------|
| <i>Caborca block samples</i>               |                 |                                    |                     |                                    |                                                   |
| CA-17                                      | La Silla Sur II | 4                                  | 1.16                | 432 ± 51                           | 1777 ± 19                                         |
| CA-12                                      | Bustamante II   | 1                                  | N.A. <sup>(f)</sup> | 1126 (Forced)                      | 1763 ± 12                                         |
| CA-4                                       | El Tullido      | 4                                  | 8.9                 | 1026 ± 87                          | 1748 ± 66                                         |
| CA-1                                       | Quitovac I      | 4                                  | 1.07                | 358 ± 35                           | 1747.7 ± 8.2                                      |
| CA-16                                      | Quitovac II     | 2                                  | N.A. <sup>(f)</sup> | 402 ± 71                           | 1747 ± 10                                         |
| CA-11                                      | La Silla Sur I  | 5                                  | 12                  | 273 ± 62                           | 1740 ± 30                                         |
| CA-18                                      | San Fernando    | 4                                  | 1.4                 | 207 ± 38                           | 1718.8 ± 7.9                                      |
| CA-19                                      | Lomas Rojas     | 4                                  | 6.8                 | 275 ± 820                          | 1718 ± 160                                        |
| CA-20                                      | El Molino       | 3                                  | 0.027               | 159 ± 93                           | 1708.4 ± 5.2                                      |
| CA-14                                      | San Antonio     | 2                                  | N.A. <sup>(f)</sup> | 284 ± 170                          | 1699 ± 16                                         |
| CA-15                                      | La Toñita       | 2                                  | N.A.                | 328 ± 110                          | 1693.3 ± 8.2                                      |
| <i>"Grenvillian" Caborca block samples</i> |                 |                                    |                     |                                    |                                                   |
| CAG-2                                      | Bustamante I    | 2                                  | N.A. <sup>(f)</sup> | 573 ± 190                          | 1126 ± 40                                         |
| CAG-13                                     | Bustamante III  | 2                                  | N.A. <sup>(f)</sup> | 405 ± 570                          | 1112 ± 100                                        |
| <i>"North America" block samples</i>       |                 |                                    |                     |                                    |                                                   |
| NA-3                                       | El Chacón III   | 4                                  | 0.68                | 199 ± 180                          | 1714.0 ± 9.5                                      |
| NA-8                                       | El Chacón I     | 3                                  | 0.55                | 214 ± 52                           | 1704.9 ± 6.2                                      |
| NA-7                                       | El Chacón II    | 3                                  | 0.15                | 162 ± 110                          | 1703.2 ± 8.2                                      |
| NA-5                                       | La Colorada     | 3                                  | 0.13                | 160.1 ± 7.8                        | 1656.8 ± 4.4                                      |

<sup>(c)</sup> Number of fractions used in calculation of age.  
<sup>(d)</sup> MSWD = Mean Square of Weighted Deviates: A measure of the ratio of the observed scatter of the points (from the best-fit line) to the expected scatter (from the assigned errors and error correlation).  
<sup>(e)</sup> Upper-intercept age calculated using Isoplot/Ex regression treatment of Ludwig (1998) and interpreted here as possible crystallization age of the rock. Errors are given at the 95% confidence level.  
<sup>(f)</sup> N.A. = not applicable.

## **Caborca Block Granitoids**

**Quitovac I (CA-1).** A granite sample (Quitovac I, CA-1) that shows deformational fabrics was collected in the eastern part of the Sierra Quitovac (Fig. 3). Four zircon fractions (A, B, C, and D), including small to medium size euhedral zircon crystals of purplish to pinkish color, yielded discordant U-Pb ages (Fig. DR1). Linear regression analysis indicated an upper-intercept age of  $1747 \pm 8.2$  Ma (lower intercept =  $358 \pm 35$ ; MSWD = 1.07) that we interpret as approximating the crystallization age of the Quitovac I tectonized granite.

**Quitovac II (CA-16).** A second sample (Quitovac II, CA-16) was collected in Sierra Quitovac (Fig. 3) in an attempt to see whether the deformational fabrics preserved in sample CA-1 (Quitovac I) could have an impact in the U-Pb geochronology. We analyzed four different zircon fractions (A, B, C, and D) of small-to medium-size euhedral crystals of purplish to pinkish color with discordant behavior (Fig. DR1). The regressed line with the four analyses yielded an upper-intercept age of  $1717 \pm 61$  Ma (lower intercept =  $116 \pm 510$  Ma; MSWD = 13). However, removing the most discordant and less precise analyses (fractions C and D), that either followed a different Pb loss path than fractions A and B or contain inheritance, we obtained a line with fractions A and B defining an upper-intercept age of  $1747 \pm 10$  Ma and lower-intercept age of  $402 \pm 71$  Ma. The upper-intercept age is in agreement with the overall age of the Caborca basement and we accept this age as representative of the age for crystallization of the granitoid.

**San Fernando (CA-18).** Sample San Fernando (CA-18) was collected in the northern part of the San Fernando Hills south of Sierra La Silla (Fig. 3). Four zircon fractions were selected and analyzed. The zircons analyzed were very small, subhedral to euhedral, with purplish-yellow tints. Using all four zircon fractions, a linear regression yielded an upper-intercept age of  $1718.8 \pm 7.9$  Ma (lower intercept =  $207 \pm 38$  Ma; MSDW = 1.4) that we interpret as the approximate crystallization age of the San Fernando granite (Fig. DR1).

**La Silla Sur I (CA-11).** Outcrops of Precambrian granite in the southern part of Sierra La Silla are in a very similar geologic position as the ones in Sierra Quitovac and San Fernando Hills. La Silla Sur I (CA-11) granite was collected in the southern part of Sierra La Silla (Fig. 3) and yielded small to medium size, mostly cloudy and beige-tinged zircon crystals. Five fractions were selected and analyzed (A, B, C, D, and E). Zircons in fraction E were abraded in an attempt to remove the discordant outer domains

of the zircon grains in order to get a less discordant age. The procedure did not work and fraction E was the most discordant fraction of the rock (Fig. DR1). Using the five zircon fractions, a linear regression yielded an upper-intercept age of  $1740 \pm 30$  Ma (lower intercept =  $273 \pm 62$  Ma; MSDW = 12) that we interpret as approximating the crystallization age of the La Silla Sur I granite.

**La Silla Sur II (CA-17).** We collected sample La Silla Sur II (CA-17) in an attempt to improve the age constraints for the newly discovered Proterozoic rocks from Sierra La Silla and San Fernando Hills south of Sierra La Silla (Fig. 3). This granite yielded small to medium-sized, euhedral, and slightly tinted zircons. A linear regression of four zircon fractions (A, B, C, and D) yielded an upper-intercept age of  $1777 \pm 19$  Ma (lower intercept =  $432 \pm 51$ ; MSWD = 1.16) that we interpret as representing the crystallization age of the granite (Fig. DR1). The  $1777 \pm 19$  Ma La Silla Sur II granite is the oldest plutonic rock described from the Quitovac region.

**El Tullido (CA-4).** A two-mica granite sample (El Tullido, CA-4) was collected in the western part of Cerro El Tullido (Fig. 3). Four zircon fractions (A, B, C, and D) of small size, mostly euhedral crystals with purplish color defined a chord that yielded an upper-intercept age of  $1748 \pm 66$  Ma and a lower-intercept age of  $1026 \pm 87$  Ma with MSWD = 8.9 (Fig. DR1). We interpret the upper-intercept age as approximating the crystallization age of the granite and its lower intercept as the age of Pb loss possibly produced by metamorphism and crustal uplift related to Grenvillian plutonism-tectonism as proposed by the age of some of the samples in the Campo Bustamante Hills in the Quitovac region (CAG-2 and CAG-13).

**El Molino (CA-20).** El Molino granite (CA-20) was collected in the southeastern part of Cerro El Tullido (Fig. 3). Three zircon fractions (A, B, and C) of medium size, mostly subhedral crystals with reddish tints, defined a chord that yielded an upper-intercept age of  $1708.4 \pm 5.2$  Ma (lower-intercept =  $159 \pm 93$  Ma; MSWD = 0.027) (Fig. DR1). We interpret the upper-intercept age as the crystallization age of the granite. In contrast, the lower intercept age of El Molino granite is not similar to the Grenvillian lower intercept age of the nearby El Tullido granite (CA-4).

**San Antonio (CA-14).** The San Antonio granite (CA-14) was collected in the northeastern part of Sierra San Antonio (Fig. 3). We analyzed four zircon fractions (A, B, C, and D) but only three are regressed because of the large errors obtained for fraction D

(Fig. DR1). This fraction lies off a chord containing fractions A to C. Using fractions A and C the line yields an upper-intercept age of  $1699 \pm 16$  Ma (lower intercept =  $284 \pm 170$  Ma). If we use the least discordant fractions (A and B), the line defines an upper-intercept age of  $1718 \pm 24$  Ma (lower intercept =  $533 \pm 190$  Ma) that we interpret as representing the crystallization age of the rock.

**La Toñita (CA-15).** La Toñita granite sample (CA-15) was collected in the southernmost part of Sierra La Toñita (Fig. 3). Only two fractions (A and B) of medium- to large-size euhedral zircon crystals of tinted color were analyzed yielding discordant U-Pb ages (Fig. DR1). The upper-intercept age of  $1693.3 \pm 8.2$  Ma (lower intercept =  $328 \pm 110$  Ma) is interpreted here as the possible crystallization age for this granite.

**Lomas Rojas (CA-19).** Lomas Rojas Hills are located north of Sierra La Toñita and northwest of Campo Bustamante Hills (Fig. 3). A two-mica granite here (Lomas Rojas, CA-19) yielded small to medium-sized, subhedral, purplish-tinted zircons. Four zircon fractions (A, B, C, and D) are discordant and yield an upper-intercept age of  $1718 \pm 160$  Ma (lower intercept =  $275 \pm 820$  Ma; MSWD = 6.8) (Fig. DR1). Even though the upper-intercept age has a large error, we interpret this age as close to the age for crystallization of the Las Lomas Rojas granite.

**Bustamante II (CA-12).** A quartz-rich granitic sample (Bustamante II, CA-12) was collected in the western part of Campo Bustamante Hills approximately 7 km northwest of Quitovac (Fig. 3). Petrographic textures indicate that the rock has undergone some degree of strain. The sample yielded two zircon fractions of small, clear zircons that produced discordant and non-positively correlated results, indicating complex behavior involving multiple events of Pb-loss and/or zircon inheritance (Fig. DR1). A unique interpretation for the crystallization age of this sample is not possible with this data; however, it is evident that these zircons are at least 1400 Ma, given that their  $^{207}\text{Pb}/^{206}\text{Pb}$  ages are 1416 and 1479 Ma (upper-intercept ages extrapolated from the origin at 0 Ma through each of the analyses) for fractions A and B, respectively (Fig. DR1).

It is possible that the older fraction contained some inherited zircon component; however, there were no visible signs of core material in any of the analyzed grains in either fraction. Assuming a maximum, reasonable, lower-intercept age of  $\sim 1126$  Ma (sample CA-12 is from the Bustamante area that is dominated by Grenvillian magmatism

at  $\sim 1126$  Ma; samples CAG-2 and CAG-13), upper-intercept ages of  $1763 \pm 12$  Ma and  $2138 \pm 14$  Ma are calculated for fractions A and B, respectively.

Although the data for this sample is not good, we interpret the age of this rock is probably between 1400 and 1770 Ma (Fig. DR1).

**Bustamante I (CAG-2).** The Bustamante I granite (CAG-2) was sampled in the Campo Bustamante Hills (Fig. 3), and yielded medium-to large-sized, cloudy (opaque) zircons with deep maroon to pinkish colors. The best-fit line using three zircon fractions (A, B, and C) yielded an upper-intercept age of  $1087 \pm 190$  Ma (lower intercept =  $177 \pm 760$  Ma; MSWD = 10.5) (Fig. DR2). However, removing fraction C, the most discordant zircon fraction, changes the upper-intercept age to  $1126 \pm 40$  Ma (lower intercept =  $573 \pm 190$  Ma) that we interpret as the crystallization age for this rock. This is the first Grenvillian-age granite defined in the Quitovac region.

**Bustamante III (CAG-13).** Another of the Campo Bustamante granites, Bustamante III (CAG-13) was collected in an attempt to improve the age constraints and to determine the spatial extent of the newly discovered Grenvillian-age granites from the Campo Bustamante Hills (Fig. 3). Two fractions (A and B) of purplish-colored zircons were analyzed, yielding an upper-intercept age of  $1112 \pm 100$  Ma (lower intercept =  $405 \pm 570$  Ma) that we interpret as the best approximation for the crystallization age of this granite (Fig. DR2).

### **“North America” Block Granitoids**

**El Chacón I (NA-8).** El Chacón I granite (NA-8) was collected in the southernmost part of Cerro El Chacón area, 12 km south from the village of Quitovac (Fig. 3). These are outcrops of newly proposed Paleoproterozoic granites in the Quitovac region. Three fractions (A, B, and C) with small to medium, euhedral zircons with a faint purple tint were analyzed and defined a chord that yielded an upper-intercept age of  $1704.9 \pm 6.2$  Ma (lower intercept =  $214 \pm 52$  Ma; MSWD = 0.55) (Fig. DR3). We interpret this age as the age of crystallization for the granite.

**El Chacón II (NA-7).** This granite was also collected in the southern part of Cerro El Chacón area (Fig. 3). The zircons analyzed from this granite were small to large euhedral crystals with purple and pink tints. Three zircon fractions (A, B, and C), including an abraded fraction, were analyzed to define a chord that yielded an upper-intercept age of



1703.2  $\pm$  8.2 Ma (lower intercept = 162  $\pm$  110 Ma; MSWD = 0.15) that we interpret as the crystallization age of the El Chacón II granite (Fig. DR3). Zircons from this granite have a very similar behavior to those from the nearby El Chacón I granite of essentially the same age.

**El Chacón III (NA-3).** El Chacón III (NA-3), is a quartz monzonite sample that was also collected in Cerro El Chacón area (Fig. 3). The zircons analyzed in this granite were small to medium in size with euhedral crystals. Using the four zircon fractions (A, B, C, and D), including an abraded fraction, the linear regression analysis yielded an upper-intercept age of 1714  $\pm$  9.5 Ma (lower intercept = 199  $\pm$  180 Ma; MSDW = 0.68) (Fig. DR3) that we interpret as a close approximation of the crystallization age for the El Chacón III granite.

**La Colorada (NA-5).** La Colorada granite (NA-5) was sampled in the southeastern part of the Early Miocene La Colorada volcanic field (Fig. 3). The granite yielded small, euhedral, acicular zircons with very high discordance (~50%). The regressed chord using three zircon fractions (A, B & C) defines an upper-intercept age of 1656.8  $\pm$  4.4 Ma (lower intercept = 160.1  $\pm$  7.8; MSWD = 0.13) that we interpret as the crystallization age of the La Colorada granite (Fig. DR3). This is the youngest described Paleoproterozoic granite in the Quitovac region.

None of the U-Pb zircon ages presented here were determined from concordant results. All of the ages were calculated using a regression treatment (Ludwig, 1998) of two to five analyses that were discordant to some degree. Abrasion techniques similar to Krogh (1978) were used on several of the zircon fractions in an attempt to produce less discordant analyses, however, for reasons unknown, most of these analyses did not reduce the amount of discordance.

Twelve of 17 samples produced least-discordant analyses that were only 6% to 17% discordant. The remainder ranged from 23% to 42% discordant. Using only conventional techniques, these results are considered typical for zircon populations from granitic samples of Proterozoic to Archean age (e.g., Premo and Van Schmus, 1989). Whereas, an increasing degree of discordance is thought to reflect decreasing confidence in the accuracy of the crystallization age, we do not feel that this is always the case. Despite high degrees of discordance (e.g., NA-5; 42%), an improved degree of confidence in the

crystallization age is reflected in the linearity of some of the data, leading to relatively small age errors and corresponding MSWD values (e.g., NA-5;  $\pm 4.4$  Ma and 0.13, respectively).

In contrast, large age errors and MSWD values can be obtained on less discordant results (e.g., CA-19; 14% discordant,  $\pm 160$  Ma, and MSWD = 6.8), due to scatter in the linearity of the analyses. The cause of the scatter is often problematic, as it is possible that minute amounts of either inherited zircon or metamorphic overgrowths that were not detected by visual means on any one or more of the grains of a single zircon fraction could effect the results.

Nonetheless, we feel that the errors given on all the concordia upper-intercept ages listed are reasonably expanded to reflect realistic confidence limits and therefore most probably contain the actual crystallization age of the sample and the rock unit it represents.

### **Radiogenic Isotopes**

The analytical techniques used for the U-Th-Pb on whole-rocks were similar to those reported by Tatsumoto and Unruh (1976) and Premo and Izett (1992). The whole-rock samples were dissolved with ultrapure concentrated HF + HNO<sub>3</sub> in 7 ml PFA Teflon vials. After drying, the samples were spiked with a dilute mixed tracer of <sup>205</sup>Pb-<sup>233</sup>U-<sup>236</sup>U-<sup>230</sup>Th as well as dilute mixed tracers of <sup>84</sup>Sr-<sup>87</sup>Rb and <sup>150</sup>Nd-<sup>149</sup>Sm. The procedures for the extraction of Pb and U were the same as those listed above for the zircon chemistry; however, laboratory blanks ranged from 24 to 250 pg total Pb, averaging  $66 \pm 12$  pg with a composition of  $^{206}\text{Pb}/^{204}\text{Pb} = 18.458 \pm 0.093$ ,  $^{207}\text{Pb}/^{204}\text{Pb} = 15.287 \pm 0.03$ , and  $^{208}\text{Pb}/^{204}\text{Pb} = 37.54 \pm 0.11$ . The REE were separated from the rest of the sample using a large (30 ml resin-volume) column (Birck and Allègre, 1978), and Sm separated from Nd using the alpha-isobutyric method of Lugmair et al. (1975). Laboratory chemical contamination levels (blanks) were on the order of 500 pg total Sr or Nd and are essentially negligible compared to the sample aliquot amounts. Sm and Nd were loaded with very dilute H<sub>3</sub>PO<sub>4</sub> acid onto tantalum filaments in the triple filament mode and run on a fully automated multi-sample VG Isomass 54R mass spectrometer. Instrumental bias was monitored using Sr (SRM 987) and Nd (La Jolla) standards with average values of  $0.70126 \pm 1$  and

$0.51186 \pm 1$  respectively. Uncertainties on isotopic ratios are given as footnotes in the accompanying data tables, and are reported at the 2-sigma level.

### **Sm-Nd Isotopes**

Results of the Sm-Nd isotopic systematics for whole-rock powders of the Quitovac rock suite are given in Table DR5 and shown in Figs. 5, 6, and DR4. Although the entire suite does not yield a single array in a  $^{143}\text{Nd}/^{144}\text{Nd}$  versus  $^{147}\text{Sm}/^{144}\text{Nd}$  isochron plot (Fig. DR4), these results are in general better behaved than the previous Pb systematics. Two isochrons can be defined by some of the Paleoproterozoic samples from the Quitovac region. The “North America” block samples (NA-5, 6, and 7) define an isochron age of  $1663 \pm 36$  Ma with an initial  $\epsilon\text{Nd}$  value of  $\sim +2.5$ . The bulk of the Caborca block samples (CA-9, 11, 15, 16, 17, 19, and 20) define an isochron age of  $1715 \pm 94$  Ma with an initial  $\epsilon\text{Nd}$  value of  $\sim +1.2$  (Fig. DR4). The Nd isochron ages for the Caborca and “North America” blocks are very similar to their actual crystallization ages determined by U-Pb zircon geochronology (Table DR3). This indicates that the original Nd isotopic compositions of these basement rocks in Quitovac are still preserved and may be used as an indicator of tectono-magmatic environments.

### **Rb-Sr Isotopes**

The results of the Rb-Sr whole-rock isotopic systematics for the Quitovac rocks are given in Table DR6 and shown in a  $^{87}\text{Sr}/^{86}\text{Sr}$  versus  $^{87}\text{Rb}/^{86}\text{Sr}$  isochron plot in Figure DR5. It is immediately obvious that the Rb-Sr systematics are not well behaved and the isotopic data are very scattered, forming several pseudo-isochrons that probably represent partial to complete resetting of the isotopic system at the ages indicated. An isochron age of  $1476 \pm 210$  Ma is obtained for the entire suite of Paleoproterozoic samples, somewhat younger than the 1613 Ma Pb-Pb age for the same suite. An apparent age of  $1443 \pm 73$  Ma is obtained for the “North America” block samples (NA-3, 5, 6, 7, and 8), although three of these samples yield the best-behaved isochron age at  $1571 \pm 6.6$  Ma with a Sr initial value = 0.70214, a very reasonable depleted initial value at 1.7 Ga. Calculated initial Sr values for samples NA-6 and 7 are more depleted at 0.7013, and slightly more depleted than the model depleted mantle value at 1.7 Ga (0.7017). However, these values are highly suspect due to the nature of their alteration during subsequent deformation,

TABLE DR4. U-Th-Pb ANALYTICAL DATA FOR WHOLE-ROCK SAMPLES FROM PROTEROZOIC BASEMENT ROCKS IN  
THE QUITOVAC REGION, NW SONORA, MEXICO

| Sample                                     | Location                   | Weight<br>(mg) | U<br>(ppm) | Th<br>(ppm)       | Pb<br>(ppm) | $^{206}\text{Pb}^+$<br>$^{204}\text{Pb}$ | $^{207}\text{Pb}^+$<br>$^{204}\text{Pb}$ | $^{208}\text{Pb}^+$<br>$^{204}\text{Pb}$ | $^{238}\text{U}^+$<br>$^{204}\text{Pb}$ | $^{232}\text{Th}^+$<br>$^{204}\text{Pb}$ | $^{206}\text{Pb}^+$<br>$^{204}\text{Pb}$ | $^{207}\text{Pb}^+$<br>$^{204}\text{Pb}$ | $^{208}\text{Pb}^+$<br>$^{204}\text{Pb}$ |
|--------------------------------------------|----------------------------|----------------|------------|-------------------|-------------|------------------------------------------|------------------------------------------|------------------------------------------|-----------------------------------------|------------------------------------------|------------------------------------------|------------------------------------------|------------------------------------------|
| <i>Caborca block samples</i>               |                            |                |            |                   |             |                                          |                                          |                                          |                                         |                                          |                                          |                                          |                                          |
| CA-1                                       | Quitovac I                 | 77.72          | 2.27       | 9.93              | 10.9        | 23.432<br>15 <sup>§</sup>                | 16.138<br>15                             | 42.566<br>52                             | 14.91<br>3                              | 67.5<br>1                                | 18.788                                   | 15.641                                   | 36.471                                   |
| CA-4                                       | El Tullido                 | 73.73          | 0.72       | 3.15              | 10.4        | 19.340<br>13                             | 15.760<br>15                             | 38.993<br>48                             | 4.47<br>1                               | 20.3<br>1                                | 17.947                                   | 15.611                                   | 37.159                                   |
| CA-9                                       | La Toñita<br>(Amphibolite) | 56.72          | 0.29       | 0.78              | 2.81        | 20.158<br>12                             | 15.795<br>14                             | 38.677<br>47                             | 6.70<br>2                               | 18.7<br>1                                | 18.067                                   | 15.572                                   | 36.986                                   |
| CA-11                                      | La Silla Sur I             | 85.75          | 3.00       | 11.2              | 19.0        | 19.337<br>13                             | 15.703<br>15                             | 38.680<br>48                             | 10.19<br>4                              | 39.3<br>2                                | 16.179                                   | 15.367                                   | 35.150                                   |
| CA-12                                      | Bustamante II              | 81.83          | 1.02       | N.D. <sup>#</sup> | 7.59        | 21.306<br>14                             | 16.006<br>15                             | 40.898<br>51                             | 9.22<br>2                               | N.D. <sup>#</sup>                        | N.D. <sup>#</sup>                        | N.D. <sup>#</sup>                        | N.D. <sup>#</sup>                        |
| CA-14                                      | San Antonio                | 84.24          | 1.49       | 7.45              | 9.90        | 21.604<br>13                             | 15.932<br>14                             | 41.262<br>50                             | 10.35<br>2                              | 53.6<br>1                                | 18.483                                   | 15.607                                   | 36.557                                   |
| CA-15                                      | La Toñita                  | 85.04          | 1.50       | 10.4              | 13.1        | 20.138<br>12                             | 15.818<br>15                             | 41.323<br>50                             | 7.78<br>3                               | 55.7<br>2                                | 17.801                                   | 15.575                                   | 36.458                                   |
| CA-16                                      | Quitovac II                | 89.23          | 2.44       | 9.15              | 11.1        | 23.188<br>14                             | 16.087<br>15                             | 41.877<br>51                             | 15.57<br>4                              | 60.4<br>3                                | 18.342                                   | 15.569                                   | 36.423                                   |
| CA-17                                      | La Silla Sur II            | 81.10          | 2.05       | 16.4              | 34.0        | 19.296<br>12                             | 15.701<br>14                             | 39.237<br>48                             | 3.92<br>1                               | 32.4<br>1                                | 18.052                                   | 15.566                                   | 36.255                                   |
| CA-18                                      | San Fernando               | 82.46          | 3.43       | 16.8              | 26.3        | 21.269<br>14                             | 15.885<br>15                             | 39.961<br>49                             | 8.83<br>2                               | 44.6<br>1                                | 18.571                                   | 15.601                                   | 35.999                                   |
| CA-19                                      | Lomas Rojas                | 85.86          | 3.06       | 13.1              | 11.8        | 22.830<br>15                             | 16.070<br>15                             | 42.256<br>52                             | 18.50<br>8                              | 81.5<br>7                                | 17.194                                   | 15.477                                   | 35.025                                   |
| CA-20                                      | El Molino                  | 77.69          | 1.95       | 10.6              | 9.86        | 22.960<br>18                             | 16.072<br>17                             | 44.080<br>60                             | 14.37<br>2                              | 80.6<br>2                                | 18.600                                   | 15.616                                   | 36.969                                   |
| <i>"Grenvillian" Caborca block samples</i> |                            |                |            |                   |             |                                          |                                          |                                          |                                         |                                          |                                          |                                          |                                          |
| CAG-2                                      | Bustamante I               | 52.30          | 3.68       | 13.2              | 25.0        | 19.597<br>12                             | 15.706<br>15                             | 38.936<br>71                             | 9.58<br>3                               | 35.5<br>1                                | 17.769                                   | 15.565                                   | 36.902                                   |
| CAG-13                                     | Bustamante III             | 82.78          | 3.84       | 18.7              | 24.9        | 21.513<br>13                             | 15.928<br>15                             | 40.651<br>50                             | 10.54<br>4                              | 53.2<br>10                               | 19.528                                   | 15.776                                   | 37.645                                   |
| <i>"North America" block samples</i>       |                            |                |            |                   |             |                                          |                                          |                                          |                                         |                                          |                                          |                                          |                                          |
| NA-3                                       | El Chacón III              | 55.79          | 1.38       | 4.12              | 8.83        | 18.842<br>18                             | 15.634<br>20                             | 38.022<br>57                             | 9.99<br>2                               | 30.7<br>1                                | 15.799                                   | 15.315                                   | 35.499                                   |
| NA-5                                       | La Colorada                | 68.50          | 4.07       | 13.1              | 26.4        | 19.335<br>14                             | 15.683<br>16                             | 38.286<br>49                             | 9.88<br>3                               | 32.9<br>1                                | 16.438                                   | 15.388                                   | 35.479                                   |
| NA-6                                       | El Chacón<br>(Amphibolite) | 61.01          | 0.24       | 0.65              | 3.13        | 18.393<br>11                             | 15.621<br>14                             | 38.724<br>47                             | 4.79<br>1                               | 13.6<br>1                                | 16.946                                   | 15.470                                   | 37.528                                   |
| NA-7                                       | El Chacón II               | 60.13          | 0.66       | 2.56              | 8.78        | 18.356<br>12                             | 15.584<br>15                             | 38.314<br>48                             | 4.72<br>1                               | 19.0<br>1                                | 16.929                                   | 15.435                                   | 36.640                                   |
| NA-8                                       | El Chacón I                | 62.95          | 0.64       | 6.64              | 12.6        | 17.470<br>12                             | 15.496<br>15                             | 39.027<br>49                             | 3.20<br>1                               | 34.5<br>1                                | 16.502                                   | 15.395                                   | 35.992                                   |

<sup>(\*)</sup> Corrected ratios; corrected for mass fractionation ( $0.13 \pm 0.05$  ‰ per a.m.u.) and blank Pb (variable amounts between 10 and 70 pg total Pb; blank composition:  $^{206}\text{Pb}/^{204}\text{Pb} = 18.458 \pm 0.093$ ;  $^{207}\text{Pb}/^{204}\text{Pb} = 15.287 \pm 0.03$ ; and  $^{208}\text{Pb}/^{204}\text{Pb} = 37.54 \pm 0.11$ ) using the reduction program of Ludwig (1989).

<sup>(†)</sup> Initial ratios, calculated by subtracting the amount of  $^{206}\text{Pb}$ ,  $^{207}\text{Pb}$ , and  $^{208}\text{Pb}$  that has accumulated from the decay of U and Th in each sample since the formation of the rock, taken to be the zircon age.

<sup>(§)</sup> Uncertainty at 2 sigma, corresponding to the last two digits of the ratio.

<sup>(#)</sup> N.D. = not determined.

TABLE DR5. Sm-Nd ANALYTICAL DATA FOR WHOLE-ROCK SAMPLES FROM PROTEROZOIC BASEMENT ROCKS IN THE QUITOVAC REGION, NW SONORA, MEXICO

| Sample                                     | Location                | Weight (mg) | Sm* (ppm) | Nd* (ppm) | <sup>147</sup> Sm/ <sup>144</sup> Nd <sup>†</sup> | <sup>143</sup> Nd/ <sup>144</sup> Nd <sup>†</sup> | <sup>143</sup> Nd/ <sup>144</sup> Nd <sub>i</sub> <sup>‡</sup> | εNd <sup>§</sup> | T <sub>DM</sub> <sup>¶¶</sup> (Ma) |
|--------------------------------------------|-------------------------|-------------|-----------|-----------|---------------------------------------------------|---------------------------------------------------|----------------------------------------------------------------|------------------|------------------------------------|
| <i>Caborca block samples</i>               |                         |             |           |           |                                                   |                                                   |                                                                |                  |                                    |
| CA-1                                       | Quitovac I              | 77.72       | 6.43      | 32.1      | 0.1210<br>1                                       | 0.511894<br>14                                    | 0.510503<br>13                                                 | 2.6<br>32        | 1880                               |
| CA-4                                       | El Tullido              | 73.73       | 5.08      | 24.1      | 0.1269<br>1                                       | 0.511863<br>14                                    | 0.510404<br>18                                                 | 0.6<br>33        | 2070                               |
| CA-9                                       | La Toñita (Amphibolite) | 56.72       | 1.45      | 5.12      | 0.1709<br>1                                       | 0.512402<br>21                                    | 0.510435<br>17                                                 | 1.3<br>33        | 2280                               |
| CA-11                                      | La Silla Sur I          | 85.75       | 5.07      | 23.4      | 0.1306<br>1                                       | 0.511950<br>19                                    | 0.510456<br>21                                                 | 1.4<br>33        | 2000                               |
| CA-12                                      | Bustamante II           | 81.83       | 2.78      | 15.8      | 0.1058<br>1                                       | 0.511752<br>12                                    | 0.510525<br>12                                                 | 3.4<br>32        | 1820                               |
| CA-14                                      | San Antonio             | 84.24       | 5.38      | 24.4      | 0.1333<br>1                                       | 0.512040<br>10                                    | 0.510551<br>21                                                 | 2.2<br>33        | 1890                               |
| CA-15                                      | La Toñita               | 85.04       | 6.23      | 30.6      | 0.1229<br>1                                       | 0.511875<br>10                                    | 0.510507<br>17                                                 | 1.2<br>33        | 1950                               |
| CA-16                                      | Quitovac II             | 89.23       | 5.53      | 26.9      | 0.1243<br>2                                       | 0.511871<br>9                                     | 0.510443<br>27                                                 | 1.3<br>34        | 1990                               |
| CA-17                                      | La Silla Sur II         | 81.10       | 5.63      | 30.2      | 0.1124<br>1                                       | 0.511745<br>13                                    | 0.510432<br>16                                                 | 1.9<br>33        | 1950                               |
| CA-18                                      | San Fernando            | 82.46       | 4.92      | 28.6      | 0.1038<br>1                                       | 0.511671<br>10                                    | 0.510498<br>11                                                 | 1.7<br>32        | 1900                               |
| CA-19                                      | Lomas Rojas             | 85.86       | 6.39      | 31.1      | 0.1240<br>1                                       | 0.511873<br>10                                    | 0.510472<br>17                                                 | 1.2<br>33        | 1980                               |
| CA-20                                      | El Molino               | 77.69       | 6.42      | 33.5      | 0.1158<br>1                                       | 0.511769<br>18                                    | 0.510468<br>14                                                 | 0.8<br>32        | 1980                               |
| <i>"Grenvillian" Caborca block samples</i> |                         |             |           |           |                                                   |                                                   |                                                                |                  |                                    |
| CAG-2                                      | Bustamante I            | 52.30       | 12.0      | 58.0      | 0.1247<br>1                                       | 0.512034<br>10                                    | 0.511113<br>17                                                 | -1.4<br>32       | 1720                               |
| CAG-13                                     | Bustamante III          | 82.78       | 5.82      | 34.7      | 0.1012<br>1                                       | 0.511734<br>10                                    | 0.510996<br>14                                                 | -4.0<br>32       | 1770                               |
| <i>"North America" block samples</i>       |                         |             |           |           |                                                   |                                                   |                                                                |                  |                                    |
| NA-3                                       | El Chacón III           | 55.79       | 4.25      | 22.2      | 0.1155<br>1                                       | 0.511920<br>16                                    | 0.510618<br>18                                                 | 3.9<br>33        | 1740                               |
| NA-5                                       | La Colorada             | 68.50       | 4.19      | 23.8      | 0.1062<br>1                                       | 0.511769<br>13                                    | 0.510612<br>15                                                 | 2.3<br>32        | 1800                               |
| NA-6                                       | El Chacón (Amphibolite) | 61.01       | 1.48      | 5.04      | 0.1772<br>1                                       | 0.512548<br>11                                    | 0.510567<br>12                                                 | 2.6<br>32        | 2050                               |
| NA-7                                       | El Chacón II            | 60.13       | 1.61      | 11.2      | 0.0869<br>2                                       | 0.511578<br>19                                    | 0.510605<br>24                                                 | 3.4<br>32        | 1760                               |
| NA-8                                       | El Chacón I             | 62.95       | 3.06      | 17.6      | 0.1048<br>1                                       | 0.511790<br>14                                    | 0.510615<br>12                                                 | 3.6<br>32        | 1750                               |

<sup>(\*)</sup> Concentration uncertainties for Sm and Nd are ~0.5 % and ~0.1 %, respectively.

<sup>(†)</sup> Isotopic ratios corrected for blank and mass fractionation, <sup>143</sup>Nd/<sup>144</sup>Nd data are normalized to <sup>146</sup>Nd/<sup>144</sup>Nd = 0.7219 and adjusted for instrumental bias to <sup>143</sup>Nd/<sup>144</sup>Nd = 0.511860 for the La Jolla Nd standard. The mean value of <sup>143</sup>Nd/<sup>144</sup>Nd for 30 analyses of the La Jolla Nd standard was 0.511865 ± 10. Uncertainties correspond to the last significant figure(s) at the 95% confidence level.

<sup>(‡)</sup> Initial <sup>143</sup>Nd/<sup>144</sup>Nd ratios and εNd are calculated using U-Pb zircon ages from Table DR3; λ = 6.54 × 10<sup>-12</sup>/yr; present day

(<sup>143</sup>Nd/<sup>144</sup>Nd)<sub>CHUR</sub> = 0.512638, and (<sup>147</sup>Sm/<sup>144</sup>Nd)<sub>CHUR</sub> = 0.1967, where CHUR = chondritic uniform reservoir.

<sup>(¶¶)</sup> Nd model ages (T<sub>DM</sub>) are calculated relative to depleted mantle (DM) evolution by solving for T (age in Ga) in the expression: εNd(T) = 0.25T<sup>2</sup> - 3T + 8.5 (DePaolo, 1981).

TABLE DR6. Rb-Sr ANALYTICAL DATA FOR WHOLE-ROCK SAMPLES FROM PROTEROZOIC BASEMENT  
ROCKS IN THE QUITOVAC REGION, NW SONORA, MEXICO

| Sample                                     | Location                   | Weight<br>(mg) | Rb <sup>†</sup><br>(ppm) | Sr <sup>†</sup><br>(ppm) | <sup>87</sup> Rb/ <sup>86</sup> Sr <sup>†</sup> | <sup>87</sup> Sr/ <sup>86</sup> Sr <sup>†</sup> | <sup>87</sup> Sr/ <sup>86</sup> Sr <sub>i</sub> <sup>§</sup> | ε <sub>Sr</sub> <sup>§</sup> |
|--------------------------------------------|----------------------------|----------------|--------------------------|--------------------------|-------------------------------------------------|-------------------------------------------------|--------------------------------------------------------------|------------------------------|
| <i>Caborca block samples</i>               |                            |                |                          |                          |                                                 |                                                 |                                                              |                              |
| CA-1                                       | Quitovac I                 | 77.72          | 150.1                    | 134.9                    | 3.2376<br>654                                   | 0.769227<br>15                                  | (0.687860)                                                   | N.A. <sup>#</sup>            |
| CA-4                                       | El Tullido                 | 73.73          | 96.0                     | 163.7                    | 1.7037<br>18                                    | 0.747175<br>21                                  | 0.704358<br>3142                                             | 27.5                         |
| CA-9                                       | La Toñita<br>(Amphibolite) | 56.72          | 4.2                      | 140.3                    | 0.0869<br>1                                     | 0.711399<br>15                                  | 0.709213<br>22                                               | 96.6<br>8                    |
| CA-11                                      | La Silla Sur I             | 85.75          | 179.9                    | 248.3                    | 2.1018<br>30                                    | 0.735389<br>21                                  | (0.682812)                                                   | N.A. <sup>#</sup>            |
| CA-12                                      | Bustamante II              | 81.83          | 32.8                     | 120.3                    | 0.7911<br>10                                    | 0.727220<br>120                                 | 0.707166<br>778                                              | 67.7                         |
| CA-14                                      | San Antonio                | 84.24          | 124.5                    | 162.7                    | 2.2237<br>120                                   | 0.754540<br>420                                 | (0.700240)                                                   | (-32.0)                      |
| CA-15                                      | La Toñita                  | 85.04          | 118.3                    | 167.8                    | 2.0485<br>92                                    | 0.752080<br>14                                  | (0.702237)                                                   | (-3.7)                       |
| CA-16                                      | Quitovac II                | 89.23          | 129.6                    | 130.5                    | 2.8888<br>39                                    | 0.764834<br>28                                  | (0.692275)                                                   | N.A. <sup>#</sup>            |
| CA-17                                      | La Silla Sur II            | 81.10          | 149.9                    | 231.1                    | 1.8839<br>82                                    | 0.746334<br>22                                  | (0.698191)                                                   | N.A. <sup>#</sup>            |
| CA-18                                      | San Fernando               | 82.46          | 142.2                    | 139.0                    | 2.9806<br>47                                    | 0.780985<br>62                                  | (0.707333)                                                   | (69.3)                       |
| CA-19                                      | Lomas Rojas                | 85.86          | 104.4                    | 157.9                    | 1.9208<br>56                                    | 0.751210<br>260                                 | (0.703774)                                                   | (18.6)                       |
| CA-20                                      | El Molino                  | 77.69          | 147.2                    | 138.5                    | 3.0924<br>48                                    | 0.769616<br>22                                  | (0.693698)                                                   | N.A. <sup>#</sup>            |
| <i>"Grenvillian" Caborca block samples</i> |                            |                |                          |                          |                                                 |                                                 |                                                              |                              |
| CAG-2                                      | Bustamante I               | 52.30          | 142.6                    | 182.2                    | 2.2740<br>38                                    | 0.748642<br>25                                  | (0.711990)                                                   | (125.4)                      |
| CAG-13                                     | Bustamante III             | 82.78          | 211.4                    | 194.9                    | 3.1662<br>48                                    | 0.797744<br>33                                  | (0.747352)                                                   | N.A. <sup>#</sup>            |
| <i>"North America" block samples</i>       |                            |                |                          |                          |                                                 |                                                 |                                                              |                              |
| NA-3                                       | El Chacón III              | 55.79          | 76.9                     | 515.1                    | 0.4323<br>6                                     | 0.713203<br>21                                  | 0.702552<br>244                                              | 1.2<br>20                    |
| NA-5                                       | La Colorada                | 68.50          | 123.8                    | 132.9                    | 2.7070<br>38                                    | 0.759359<br>24                                  | (0.694911)                                                   | N.A. <sup>#</sup>            |
| NA-6                                       | El Chacón<br>(Amphibolite) | 61.01          | 14.9                     | 137.9                    | 0.3133<br>4                                     | 0.709216<br>36                                  | 0.701560<br>135                                              | -13.2<br>12                  |
| NA-7                                       | El Chacón II               | 60.13          | 58.7                     | 344.9                    | 0.4924<br>7                                     | 0.713244<br>15                                  | 0.701191<br>204                                              | -18.4<br>16                  |
| NA-8                                       | El Chacón I                | 62.95          | 90.3                     | 351.8                    | 0.7433<br>7                                     | 0.718907<br>21                                  | 0.700692<br>523                                              | -25.5<br>37                  |

<sup>†</sup> Concentration uncertainties for Rb and Sr are ~1.0 % and ~0.5 %, respectively.

<sup>(†)</sup> Isotopic ratios corrected for blank and mass fractionation. <sup>87</sup>Sr/<sup>86</sup>Sr data are normalized to <sup>86</sup>Sr/<sup>88</sup>Sr = 0.1194 and adjusted for instrumental bias to <sup>87</sup>Sr/<sup>86</sup>Sr = 0.710265 for NBS SRM 987 standard. The mean value of <sup>87</sup>Sr/<sup>86</sup>Sr for 30 analyses the Sr standard was 0.710265 ± 10. Uncertainties correspond to the last significant figure(s) at the 95% confidence level.

<sup>(§)</sup> Initial <sup>87</sup>Sr/<sup>86</sup>Sr ratios and ε<sub>Sr</sub> are calculated using U-Pb zircon ages from Table DR3; λ = 1.42 x 10<sup>-11</sup>/yr; present day (<sup>87</sup>Sr/<sup>86</sup>Sr)<sub>UR</sub> = 0.7045, and (<sup>87</sup>Rb/<sup>86</sup>Sr)<sub>UR</sub> = 0.0824, where UR = Uniform Reservoir. Numbers in parentheses are highly unreliable to impossible, owing mostly to <sup>87</sup>Rb/<sup>86</sup>Sr values of ~2.0 or greater and a large correction for radiogenic <sup>87</sup>Sr.

<sup>(#)</sup> N.A. = not applicable.

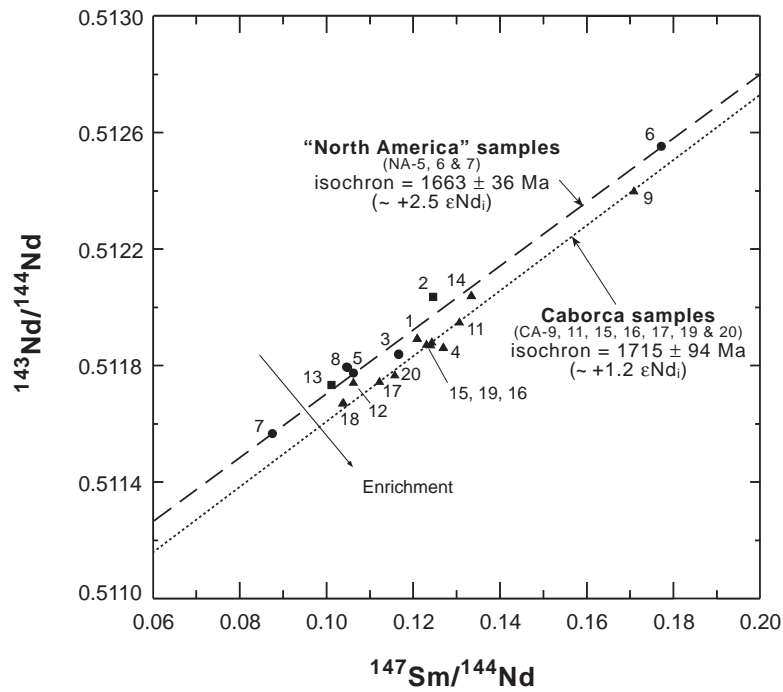

**Figure DR4.**  $^{143}\text{Nd}/^{144}\text{Nd}$  versus  $^{147}\text{Sm}/^{144}\text{Nd}$  isochron plot for Proterozoic samples from the Quitovac region in northwestern Sonora, Mexico. The Paleoproterozoic granites for the Caborca and “North America” blocks are represented by black triangles and circles, respectively. The Grenvillian-age samples from the Campo Bustamante area in Quitovac are symbolized by black squares. Dotted and dashed lines are isochrons for selected samples from the Caborca ( $\sim 1715 \text{ Ma}$ ) and “North America” ( $\sim 1663 \text{ Ma}$ ) blocks, respectively. Numbers next to the symbols represent the sample number without the letter prefix.

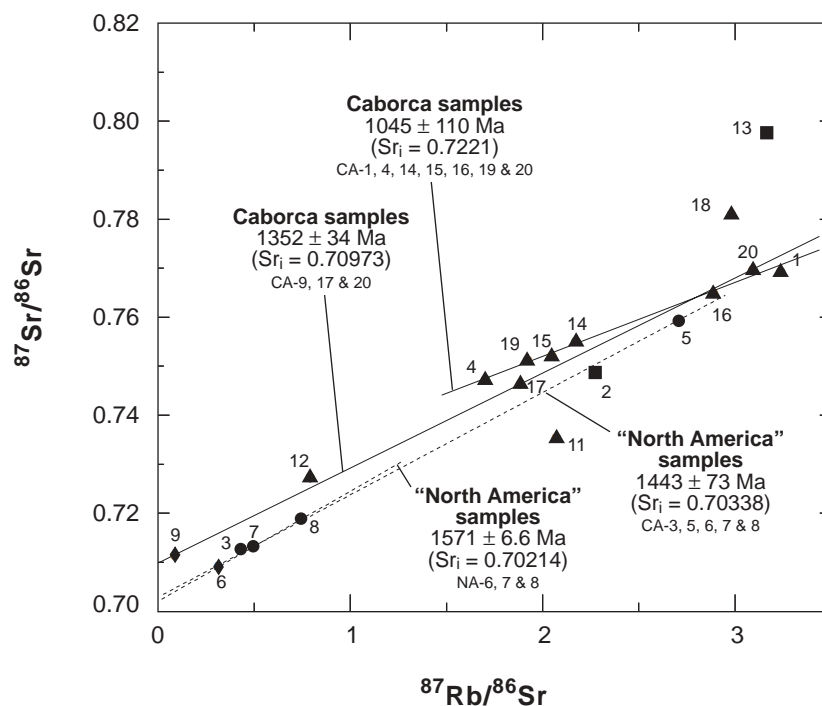

**Figure DR5.**  $^{87}\text{Sr}/^{86}\text{Sr}$  versus  $^{87}\text{Rb}/^{86}\text{Sr}$  isochron plot for Proterozoic samples from the Quitovac region in northwestern Sonora, Mexico. The Paleoproterozoic granites for the Caborca and “North America” blocks are represented by black triangles and circles, respectively. The Grenvillian-age samples from the Campo Bustamante area in Quitovac are symbolized by black squares. Numbers next to the symbols represent the sample number without the letter prefix.



metamorphism and uplift. From the Caborca block sample suite, the most depleted initial Sr value is 0.7022 from sample CA-15, and the most enriched (CA-4) at 0.7044; although once again, the isotopic systematics of most of the samples are not well preserved and are therefore suspect. The bulk of the Caborca block samples (CA-1, 4, 14, 15, 16, 19, and 20) lie along an ill-defined isochron at  $1045 \pm 110$  Ma, very near the age for both the Grenvillian samples and the concordia lower-intercept age for CA-4, suggesting that a real geological event at that time affected these rocks. Despite the lack of primary ages by this isotopic technique, there is some indication of derivation from a depleted source for at least the “North America” block samples.

### **Major Element Geochemistry**

Ten major element oxides were determined by wavelength dispersive X-ray fluorescence spectrometry (WDXRF) using a Phillips PW1606 spectrometer as described by Mee et al. (1996). A 0.8-g portion of minus 80-mesh of each sample was ignited in a tared 95% Pt/ 5% Au crucible at 925°C for 45 minutes. The weight loss was reported as percent loss on ignition (LOI). After fusion, a charge of 8 g of lithium tetraborate was added and thoroughly mixed with the sample. The combined weights of the sample and the flux were calculated to present an “infinitely thick” sample disk to the instrument. A 0.250 ml aliquot of the 1:1 LiBr solution was added as a non-wetting agent. Seven crucibles containing samples, and seven empty molds, were loaded onto the automatic fluxer. The loaded apparatus was placed in a muffle furnace at 1120°C. The samples were allowed to come to temperature for 10 minutes, and then they were homogenized in the furnace with an electric motor mechanism for 35 minutes. The fluxer was removed from the furnace, and the molten mixtures were poured from the seven crucibles into their respective molds, and cooled to near room temperature.

Using the wavelength dispersive X-ray spectrometer, the major element concentrations were determined by comparing the intensities obtained from standards with those obtained from the samples (Taggart et al., 1987). In addition to instrument standards, a standard sample (TB-1) disc was prepared and analyzed for every 20 rock samples analyzed. If the discs showed a deviation of 3 standard deviations or more, and the instrument standards showed no deviation, then another sample of TB-1 was prepared. If both, the sample preparation standard and the instrumental standard exceeded

TABLE DR7. MAJOR- AND TRACE-ELEMENT COMPOSITIONS OF PROTEROZOIC BASEMENT ROCKS IN THE QUITOVAC REGION, NW SONORA, MEXICO

| Sample                             | Caborca block samples |          |                   |          |          |          |          |          |          |          |          |          |                     |                      | "North America" block samples |          |                   |          |          |
|------------------------------------|-----------------------|----------|-------------------|----------|----------|----------|----------|----------|----------|----------|----------|----------|---------------------|----------------------|-------------------------------|----------|-------------------|----------|----------|
|                                    | CA-1                  | CA-4     | CA-9 <sup>a</sup> | CA-11    | CA-12    | CA-14    | CA-15    | CA-16    | CA-17    | CA-18    | CA-19    | CA-20    | CAG-2 <sup>**</sup> | CAG-13 <sup>**</sup> | NA-3                          | NA-5     | NA-6 <sup>†</sup> | NA-7     | NA-8     |
| SiO <sub>2</sub>                   | 71.07                 | 70.41    | 51.04             | 71.25    | 77       | 70.52    | 70.15    | 70.11    | 69.57    | 71.84    | 70.28    | 70.27    | 66.32               | 68.84                | 64.67                         | 73.74    | 49.75             | 72.24    | 68.17    |
| Al <sub>2</sub> O <sub>3</sub>     | 13.94                 | 14.1     | 6.27              | 14       | 10.52    | 14.07    | 14.25    | 13.8     | 14.19    | 13.95    | 13.95    | 13.96    | 14.41               | 15.17                | 15.36                         | 13.58    | 14.06             | 14       | 14.86    |
| Fe <sub>2</sub> O <sub>3</sub> (t) | 3.45                  | 3.5      | 9.6               | 3.28     | 3.32     | 3.21     | 3.27     | 3.16     | 3.37     | 2.96     | 3.54     | 3.52     | 5.97                | 2.75                 | 5.79                          | 1.73     | 8.86              | 3.62     | 4.3      |
| MgO                                | 0.47                  | 0.53     | 16.26             | 0.47     | 0.66     | 0.48     | 0.49     | 0.48     | 0.54     | 0.34     | 0.5      | 0.49     | 0.72                | 0.49                 | 2.04                          | 0.17     | 9.24              | 0.71     | 1.47     |
| CaO                                | 0.99                  | 1.48     | 13.61             | 1.53     | 1.59     | 1.53     | 1.48     | 1.32     | 1.45     | 1.29     | 1.27     | 1.36     | 2.18                | 2.01                 | 4.17                          | 0.81     | 13.35             | 2.53     | 3.25     |
| Na <sub>2</sub> O                  | 3.76                  | 3.81     | 0.48              | 3.69     | 2.68     | 3.81     | 3.59     | 3.62     | 3.1      | 3.74     | 3.55     | 3.64     | 3.4                 | 3.65                 | 4.2                           | 3.12     | 1.9               | 4.5      | 4.12     |
| K <sub>2</sub> O                   | 4.7                   | 4.61     | 0.26              | 4.31     | 2.37     | 4.64     | 4.89     | 4.78     | 5.91     | 4.1      | 4.58     | 4.78     | 4.75                | 4.7                  | 1.74                          | 5.69     | 0.57              | 1.28     | 2.15     |
| TiO <sub>2</sub>                   | 0.32                  | 0.33     | 0.32              | 0.23     | 0.17     | 0.31     | 0.32     | 0.31     | 0.21     | 0.23     | 0.31     | 0.32     | 0.68                | 0.25                 | 0.74                          | 0.14     | 0.57              | 0.34     | 0.51     |
| P <sub>2</sub> O <sub>5</sub>      | 0.12                  | 0.13     | 0.11              | 0.13     | 0.02     | 0.1      | 0.1      | 0.13     | 0.09     | 0.11     | 0.11     | 0.1      | 0.21                | 0.09                 | 0.26                          | 0.11     | 0.11              | 0.15     | 0.19     |
| MnO                                | 0.05                  | 0.06     | 0.21              | 0.05     | 0.05     | 0.06     | 0.06     | 0.06     | 0.06     | 0.06     | 0.05     | 0.06     | 0.1                 | 0.06                 | 0.08                          | 0.02     | 0.16              | 0.04     | 0.06     |
| LOI                                | 0.95                  | 0.7      | 0.53              | 0.45     | 0.86     | 0.48     | 0.41     | 1.35     | 0.46     | 0.71     | 0.86     | 0.4      | 0.95                | 0.96                 | 0.55                          | 0.41     | 0.75              | 0.38     | 0.55     |
| Total                              | 99.82                 | 99.66    | 98.69             | 99.39    | 99.24    | 99.21    | 99.01    | 99.12    | 98.95    | 99.33    | 99       | 98.9     | 99.69               | 98.97                | 99.6                          | 99.52    | 99.32             | 99.79    | 99.63    |
| A/CNK <sup>*</sup>                 | 1.07                  | 1.01     | 0.24              | 1.04     | 1.07     | 1        | 1.03     | 1.02     | 1        | 1.08     | 1.06     | 1.02     | 0.98                | 1.03                 | 0.94                          | 1.06     | 0.5               | 1.05     | 0.99     |
| [Fe/Fe+Mg] <sup>†</sup>            | 0.87                  | 0.86     | 0.35              | 0.86     | 0.82     | 0.86     | 0.86     | 0.86     | 0.85     | 0.89     | 0.86     | 0.87     | 0.88                | 0.83                 | 0.72                          | 0.9      | 0.46              | 0.82     | 0.72     |
| Fe                                 | 23700.00              | 23600.00 | 67000.00          | 24600.00 | 23681.00 | 22500.00 | 23900.00 | 22200.00 | 24300.00 | 20300.00 | 24900.00 | 25300.00 | 40800.00            | 20100.00             | 36900.00                      | 11000.00 | 61200.00          | 24500.00 | 28400.00 |
| Ca                                 | 8540.00               | 8810.00  | 107000.00         | 12300.00 | 10600.00 | 8181.00  | 7950.00  | 9830.00  | 10200.00 | 11000.00 | 6780.00  | 13400.00 | 16300.00            | 16800.00             | 32700.00                      | 6990.00  | 104000.00         | 19400.00 | 27700.00 |
| Na                                 | 26600.00              | 27000.00 | 3440.00           | 26700.00 | 20100.00 | 27900.00 | 27600.00 | 27400.00 | 23500.00 | 28400.00 | 27100.00 | 27900.00 | 23200.00            | 27500.00             | 31200.00                      | 23200.00 | 13900.00          | 32800.00 | 29700.00 |
| K                                  | 33000.00              | 34600.00 | 2210.00           | 31300.00 | 17500.00 | 37700.00 | 40900.00 | 41800.00 | 50100.00 | 36900.00 | 36700.00 | 36400.00 | 36200.00            | 35300.00             | 11600.00                      | 44800.00 | 5390.00           | 13000.00 | 17200.00 |
| Rb                                 | 143.00                | 95.70    | 7.86              | 180.00   | 35.40    | 126.00   | 125.00   | 138.00   | 156.00   | 144.00   | 110.00   | 153.00   | 136.00              | 215.00               | 72.40                         | 122.00   | 14.50             | 57.80    | 92.60    |
| Sr                                 | 131.00                | 163.00   | 90.90             | 258.00   | 146.00   | 179.00   | 187.00   | 156.00   | 252.00   | 157.00   | 175.00   | 155.00   | 179.00              | 212.00               | 552.00                        | 146.00   | 174.00            | 355.00   | 377.00   |
| Cs                                 | 3.40                  | 1.69     | 0.13              | 7.56     | 1.26     | 1.27     | 1.92     | 1.90     | 4.41     | 1.72     | 1.23     | 3.95     | 4.25                | 6.29                 | 3.89                          | 1.23     | 2.48              | 2.81     | 5.08     |
| Ba                                 | 825.00                | 1080.00  | 24.40             | 1030.00  | 1150.00  | 1070.00  | 1140.00  | 1000.00  | 1470.00  | 756.00   | 1070.00  | 983.00   | 1700.00             | 1500.00              | 710.00                        | 690.00   | 112.00            | 482.00   | 577.00   |
| Th                                 | 13.20                 | 3.24     | 0.51              | 9.19     | 4.04     | 10.50    | 11.60    | 12.60    | 12.30    | 15.60    | 13.70    | 13.60    | 15.00               | 19.60                | 3.48                          | 16.10    | 0.48              | 2.78     | 5.90     |
| U                                  | 2.70                  | 1.01     | 0.24              | 3.19     | 1.43     | 1.97     | 2.23     | 3.50     | 2.25     | 4.15     | 3.57     | 2.64     | 4.46                | 4.60                 | 1.49                          | 5.08     | 0.26              | 1.12     | 0.87     |
| Zr                                 | 248.00                | 256.00   | 111.00            | 261.00   | 257.00   | 226.00   | 245.00   | 243.00   | 248.00   | 151.00   | 236.00   | 260.00   | 582.00              | 256.00               | 168.00                        | 117.00   | 36.30             | 249.00   | 157.00   |
| Hf                                 | 6.46                  | 6.52     | 0.53              | 6.67     | 7.40     | 5.99     | 6.64     | 6.74     | 6.30     | 4.58     | 6.56     | 7.10     | 13.50               | 7.48                 | 4.14                          | 3.68     | 0.95              | 6.30     | 4.05     |
| Ta                                 | 1.09                  | 0.41     | 0.06              | 1.14     | 0.40     | 0.93     | 1.06     | 1.32     | 0.89     | 0.47     | 1.18     | 0.95     | 1.82                | 0.56                 | 1.06                          | 0.17     | 0.10              | 0.24     | 0.78     |
| W                                  | 1.63                  | 0.53     | 1.61              | 0.58     | 0.32     | 0.60     | 0.49     | 0.48     | 1.25     | 0.40     | 1.12     | 0.73     | 1.27                | 3.46                 | 0.37                          | 0.50     | 2.27              | 0.50     | 0.80     |
| Sc                                 | 5.88                  | 6.71     | 56.60             | 7.97     | 7.76     | 5.90     | 6.76     | 6.27     | 13.50    | 4.40     | 6.46     | 6.52     | 10.30               | 4.03                 | 9.62                          | 1.89     | 47.20             | 2.76     | 7.07     |
| Cr                                 | 15.50                 | 12.40    | 1870.00           | 12.10    | 19.10    | 10.60    | 10.10    | 12.90    | 14.60    | 8.47     | 13.70    | 18.60    | 11.40               | 11.90                | 43.20                         | 11.90    | 1190.00           | 13.50    | 33.70    |
| Co                                 | 3.00                  | 3.36     | 53.50             | 3.92     | 0.99     | 3.16     | 3.31     | 3.14     | 2.47     | 2.30     | 3.36     | 3.33     | 5.77                | 2.75                 | 14.70                         | 1.16     | 40.10             | 5.26     | 10.60    |
| Ni                                 | 9.40                  | 7.56     | 244.00            | 10.20    | 11.40    | 11.30    | 4.70     | 6.09     | 7.66     | 7.50     | 4.50     | 8.38     | 11.90               | 10.70                | 30.10                         | 9.65     | 159.00            | 8.19     | 21.80    |
| Zn                                 | 31.70                 | 33.40    | 80.70             | 32.80    | 48.20    | 31.60    | 40.10    | 29.00    | 33.00    | 41.20    | 31.60    | 33.20    | 93.30               | 49.40                | 56.20                         | 22.30    | 67.40             | 25.40    | 45.60    |
| As                                 | 0.90                  | 0.59     | 2.28              | 0.43     | 0.45     | 0.32     | 0.25     | 2.86     | 1.15     | 0.47     | 0.62     | 1.86     | 0.99                | 0.70                 | 0.24                          | 0.56     | 0.53              | 0.56     | 0.75     |
| Sb                                 | 0.44                  | 0.12     | 0.11              | 0.12     | 0.17     | 0.11     | 0.09     | 0.76     | 0.25     | 0.14     | 0.36     | 0.36     | 0.29                | 0.13                 | 0.10                          | 0.09     | 0.09              | 0.18     | 0.15     |
| Au (ppb)                           | 1.35                  | 0.57     | 1.27              | 0.27     | 1.70     | 0.90     | 2.43     | 0.82     | 0.17     | 1.09     | 2.19     | 0.91     | 0.13                | 0.83                 | 0.26                          | 0.34     | 1.45              | 0.10     | 0.49     |
| Y <sup>‡</sup>                     | 46                    | 31       | 11                | 29       | 21       | 41       | 39       | 34       | 26       | 21       | 42       | 39       | 62                  | 21                   | 17                            | 6.9      | 15                | 4        | 13       |
| Nb <sup>§</sup>                    | 12                    | 7.1      | < 0.2             | 7.5      | 5.4      | 11       | 9.2      | 11       | 5.3      | 6.8      | 12       | 11       | 24                  | 6.3                  | 12                            | 6.5      | 0.57              | 5.4      | 10       |
| Pb <sup>§</sup>                    | 12                    | 11       | 2.7               | 20       | 10       | 12       | 14       | 14       | 30       | 26       | 13       | 11       | 25                  | 29                   | 9.2                           | 26       | 3.5               | 9        | 13       |

Total Fe as Fe<sub>2</sub>O<sub>3</sub>. LOI = loss on ignition. Major elements in weight percent. Trace elements in ppm except Au in ppb.<sup>(\*)</sup> A/CNK = molecular ratio Al<sub>2</sub>O<sub>3</sub>/(CaO+Na<sub>2</sub>O+K<sub>2</sub>O).<sup>(†)</sup> [Fe/Fe+Mg] = FeO<sub>wt</sub>/(FeO<sub>wt</sub>+MgO).<sup>(‡)</sup> ICP-MS determined.<sup>(§)</sup> Amphibolite.<sup>(\*\*)</sup> "Grenvillian" samples from Caborca block.

control limits, then an instrument recalibration was performed. If an analysis yielded a total major element oxide determination of less than 97% or greater than 101%, then it was automatically repeated.

### **Trace Element and REE Geochemistry (INAA and ICP-MS)**

The routine procedure for instrumental neutron activation analysis (INAA) at the U.S. Geological Survey (USGS) laboratory facility in Denver involves encapsulating approximately one gram of samples and standards in heat-sealed polyethylene vials. The vials with rock samples were simultaneously irradiated in the lazy Susan facility of the USGS TRIGA nuclear reactor for 8 hours with a neutron flux of  $2.5 \times 10^{12}$  n/cm<sup>2</sup>/sec. Following a decay period of 6 to 8 days, each standard and sample was counted 90 to 120 minutes utilizing two high-resolution germanium detectors (one high-energy coaxial and one low-energy planar) coupled to a multi-channel analyzer system. The same distance between counting position and the detectors is maintained for all standards and samples, thereby eliminating errors associated with geometry differences. After an additional 7 to 9 day decay, the standards and samples were counted for 120 to 150 minutes, again maintaining an identical distance from each of the detectors for all standards and samples. Two additional counts were performed on each detector type for 240 to 300 minutes at 65 days following the irradiation. After the counting was completed, the spectral data were processed using an in-house modified version of a commercially-available computer program called SAMPO (Routti, J.T., 1969) that smoothes the spectral data and determines the net areas of the gamma-ray photopeaks and translates the area data into count rate data (e.g., counts per minute or cpm). The SAMPO program is capable of resolving overlapping and complex photopeak regions. Another data reduction program corrects the count rate data for decay time differences among the standards and samples, electronic dead time losses and unresolved interferences. The program compares the sample data (cpm/weight) to the standard data (cpm/ug) to calculate elemental abundances for each sample. In cases where multiple determinations are made, the elemental abundance data are combined and weighted according to the individual counting statistical errors. This sequential counting procedure allows for the determination of 33 elements.

QUITOVAC REGION, NW SONORA, MEXICO

<sup>(†)</sup> "Grenvillian" samples from Caborca block.

The principal error in the analysis of geologic materials by INAA is the counting statistical error, which is based on the signal to background ratio at the gamma-ray energy region of interest. A one-sigma error for a photopeak area determination is approximately equal to the square root of the total counts (i.e., background plus net counts) divided by the net counts.

Y, Nb and Pb trace elements were analyzed by inductively coupled plasma mass spectrometry (ICP-MS) using a Perkin Elmer Elan 6000 ICP-MS spectrometer following the methodology described by Lichte et al. (1987) and Meier and Lichte (1996). Briefly, each rock sample was ground in agate to pass through a 100-mesh sieve. A 0.100-g aliquot of sample is weighed and placed into a 5 ml zirconium crucible. Standard rocks and duplicates, as well as two samples of in-house glass standard for calibration PP93, are prepared using the same procedure. Approximately 0.6 g of dry sodium peroxide ( $\text{Na}_2\text{O}_2$ ) is mixed thoroughly with the sample. This mixture is kept under a heat lamp until placed into a preheated muffle furnace ( $450^\circ\text{C}$ ). After heating for 30 minutes, the crucibles are removed from the furnace and allowed cool down to room temperature. Each crucible is placed into a Savillex Teflon screw-capped bottle, and about 10 ml of deionized water (DI) is added and mixed with the sample by inverting the bottle a few times. The solution is allowed to sit for a minimum of 4 hours. The sample is mixed again, and a precise amount (0.25 ml) of Lu Internal Standard Solution (400  $\mu\text{g}/\text{ml}$  Lu) is added. The Lutetium solution serves as an internal standard to correct for instrument instability and oxide correction. About 10 ml of 25% nitric acid ( $\text{HNO}_3$ ) is added, and the solution is let stand for about 15 minutes, at which time the reaction stops. The solution is mixed thoroughly and a 5-ml aliquot is diluted with 10 ml of 1% nitric acid ( $\text{HNO}_3$ ) for ICP-MS analysis.

## REFERENCES CITED

- Birck, J. L., and Allègre, C. J., 1978, Chronology and chemical history of the parent body of basaltic achondrites studied by the  $^{87}\text{Rb}/^{87}\text{Sr}$  method: *Earth Planetary Science Letters*, v. 39, p. 37-51.
- Davis, D. W., 1982, Optimum linear regression and error estimation applied to U-Pb data: *Canadian Journal of Earth Sciences*, v. 19, p. 2141-2149.

- DePaolo, D. J., 1981, Neodymium isotopes in the Colorado Front Range and crust-mantle evolution in the Proterozoic: *Nature*, v. 291, p. 193-196.
- Krogh, T. E., 1978, Vapor transfer for the dissolution of zircons in a multi-sample capsule at high-pressure, *in* Zartman, R. E., ed., Short papers of the fourth international conference, geochronology, cosmochemistry, isotope geology: U.S. Geological Survey Open-File Report 78-701, p. 233-234
- Krogh, T. E., 1982, Improved accuracy of U-Pb zircon ages by the creation of more concordant systems using the air abrasion technique: *Geochem. Cosmochim. Acta* 46, 637-649.
- Lichte, F. E., Meier, A. L., and Crock, J. G., 1987, Determination of the rare-earth elements in geological materials by inductively coupled plasma mass spectrometry: *Analytical Chemistry*, v. 15, p. 1150-1157.
- Ludwig, K. R., 1980, Calculation of uncertainties of U-Pb data: *Earth and Planetary Science Letters*, v. 46, p. 212-220.
- Ludwig, K. R., 1989, PBDAT for MS-DOS, a computer program for IBM-PC compatibles for processing raw Pb-U-Th isotope data: U.S. Geological Survey Open-File Report 88-542.
- Ludwig, K. R., 1991, ISOPLOT: A plotting and regression program for radiogenic-isotope data: U.S. Geological Survey Open-File Report 91-445.
- Ludwig, K. R., 1998, Isoplot/Ex (V1.00b): A geochronological toolkit for Microsoft Excel: Berkeley Geochronology Center, Special Publication No.1, 44p.
- Lugmair, G. W., Scheinin, N. B., and Marti, K., 1975, Sm/Nd age history of Apollo 17 basalt 75075. Evidence for early differentiation of the Lunar exterior: *Proceedings, 6<sup>th</sup> Lunar Science Conference*, p. 1419-1429.
- Mee, S. J., Siems, D. F., and Taggart, J. E., Jr., 1996, Major element analysis by wavelength dispersive X-ray fluorescence spectrometry, *in* Arbogast, B. F., ed., Analytical methods manual for the Mineral Resource Surveys program: U.S. Geological Survey Open-File Report 96-525, p. 236-242.
- Meier, A. L., and Lichte, F. E., 1996, Rare earth elements by inductively coupled plasma-mass spectrometry, *in* Arbogast, B. F., ed., Analytical methods manual for the Mineral Resource Surveys program: U.S. Geological Survey Open-File Report 96-525, p. 166-172.

- Premo, W. R. and Van Schmus, W. R., 1989, Zircon geochronology of Precambrian rocks in southeastern Wyoming and northern Colorado, *in* Grambling, J. A., and Tewksbury, B. J., Proterozoic geology of the southern Rocky Mountains: Geological Society of America Special Paper 235, p. 13-32.
- Premo, W. R., and Izett, G. A., 1992, Isotopic signatures of black tektites from the K-T boundary on Haiti: Implications for the age and type of source material: *Meteoritics*, v. 27, p. 413-423.
- Routti, J. T., 1969, SAMPO, a Fortran IV program for computer analysis of gamma spectra from Ge (Li) detectors, and for other spectra with peaks: Lawrence Radiation Laboratory, UC Berkeley UCRL-19452, p. 1-34.
- Stacey, J. S., and Kramers, J. D., 1975, Approximation of terrestrial Lead isotope evolution by a two stage model: *Earth and Planetary Science Letters*, v. 26, p. 207-221.
- Steiger, R. H., and Jäger, E., 1977, Subcommission on geochronology: Convention on the use of decay constants in geo- and cosmochemistry: *Earth and Planetary Science Letters*, v. 36, p. 359-362.
- Taggart, J. E., Lindsay, J. R., Scott, B. A., Vivit, D. V., Bartel, A. J., and Stewart, K. C., 1987, Analysis of geologic materials by wavelength-dispersive X-ray fluorescence spectrometry. Chapter E, *in* Baedeker, P. A., ed., *Methods for geochemical analysis*: U.S. Geological Survey Bulletin 1770, p. E1-E19.
- Tatsumoto, M., and Unruh, D. M., 1976, KREEP basalt age: Grain by grain U-Th-Pb systematics study of the quartz monzodiorite clast 15405.88: *Proceedings, 7<sup>th</sup> Lunar Science Conference*, p. 2107-2129.
- York, D., 1969, Least-squares fitting of a straight line with correlated error: *Earth and Planetary Science Letters*, v. 5, p. 320-324.
